# Supplementary material for: Analysis of the economic burden of diagnosis and treatment on patients with tuberculosis in Bao’an district of Shenzhen City, China
Source: PubMed Central journal article supplement (PMC7458315; doi:10.1371/journal.pone.0237865), 2020-08-31
Supplement: pone.0237865.s007.pdf [file pone.0237865.s007.pdf]

# PLOS ONE

## Analysis of the Economic Burden of Diagnosis and Treatment on Patients with non-drug resistance Tuberculosis (TB) in the TB Control Demonstration Area of China --Manuscript Draft--

|                               |                                                                                                                                                                                                                                                                                                                                                                                                                                                                                                                                                                                                                                                                                                                                                                                                                                                                                                                                                                                                                                                                                                                                                                                                                                                                                                                                                                                                                                                                                                                                                                                                                                                                                                                                                                                                                                                                                    |
|-------------------------------|------------------------------------------------------------------------------------------------------------------------------------------------------------------------------------------------------------------------------------------------------------------------------------------------------------------------------------------------------------------------------------------------------------------------------------------------------------------------------------------------------------------------------------------------------------------------------------------------------------------------------------------------------------------------------------------------------------------------------------------------------------------------------------------------------------------------------------------------------------------------------------------------------------------------------------------------------------------------------------------------------------------------------------------------------------------------------------------------------------------------------------------------------------------------------------------------------------------------------------------------------------------------------------------------------------------------------------------------------------------------------------------------------------------------------------------------------------------------------------------------------------------------------------------------------------------------------------------------------------------------------------------------------------------------------------------------------------------------------------------------------------------------------------------------------------------------------------------------------------------------------------|
| <b>Manuscript Number:</b>     | PONE-D-20-06789R1                                                                                                                                                                                                                                                                                                                                                                                                                                                                                                                                                                                                                                                                                                                                                                                                                                                                                                                                                                                                                                                                                                                                                                                                                                                                                                                                                                                                                                                                                                                                                                                                                                                                                                                                                                                                                                                                  |
| <b>Article Type:</b>          | Research Article                                                                                                                                                                                                                                                                                                                                                                                                                                                                                                                                                                                                                                                                                                                                                                                                                                                                                                                                                                                                                                                                                                                                                                                                                                                                                                                                                                                                                                                                                                                                                                                                                                                                                                                                                                                                                                                                   |
| <b>Full Title:</b>            | Analysis of the Economic Burden of Diagnosis and Treatment on Patients with non-drug resistance Tuberculosis (TB) in the TB Control Demonstration Area of China                                                                                                                                                                                                                                                                                                                                                                                                                                                                                                                                                                                                                                                                                                                                                                                                                                                                                                                                                                                                                                                                                                                                                                                                                                                                                                                                                                                                                                                                                                                                                                                                                                                                                                                    |
| <b>Short Title:</b>           | Economic Burden of Diagnosis and Treatment on Patients with Tuberculosis                                                                                                                                                                                                                                                                                                                                                                                                                                                                                                                                                                                                                                                                                                                                                                                                                                                                                                                                                                                                                                                                                                                                                                                                                                                                                                                                                                                                                                                                                                                                                                                                                                                                                                                                                                                                           |
| <b>Corresponding Author:</b>  | Wei-Qing Chen<br>Sun Yat-sen University<br>GUangzhou, CHINA                                                                                                                                                                                                                                                                                                                                                                                                                                                                                                                                                                                                                                                                                                                                                                                                                                                                                                                                                                                                                                                                                                                                                                                                                                                                                                                                                                                                                                                                                                                                                                                                                                                                                                                                                                                                                        |
| <b>Keywords:</b>              | Tuberculosis; Cost of illness; Economic burden; China                                                                                                                                                                                                                                                                                                                                                                                                                                                                                                                                                                                                                                                                                                                                                                                                                                                                                                                                                                                                                                                                                                                                                                                                                                                                                                                                                                                                                                                                                                                                                                                                                                                                                                                                                                                                                              |
| <b>Abstract:</b>              | <p>Background: Illness-related costs experienced by patients produce a severe economic impact on households, especially those of poor families. Few studies have investigated the full costs, including direct and opportunity costs, at the patient and household levels in the south-east of China. Methods: A case follow-up study was conducted in the Bao'an district of Shenzhen City, China. Eligible new and re-treated individuals with pulmonary TB during January 1<sup>st</sup> 2013 to June 30<sup>th</sup> 2013 were enrolled. Medical and non-medical costs as well as income loss were calculated in pre-diagnosis and post-diagnosis periods, respectively. Factors associated pre-diagnosis costs and post-diagnosis costs were explored respectively with a linear regression model. Results: Of the total 514 TB patients enrolled, most were from the migrant population, and 65% were males (336), with a mean age of 32.25 (<math>\pm</math>10.11) years. The median pre-diagnosis direct costs, direct post-diagnosis costs, and post-diagnosis medical and non-medical costs were 79USD, 748USD, 542USD, and 150USD (6.2897CNY = 1USD, 2013) per patient, respectively. The median total cost of TB treatment per patient was 1218USD, corresponding to 26% of patients' annual income pre-illness. Variables associated with pre-diagnosis costs included number of times visiting health facilities, whether in hospital due to TB, education, History of TB. Variables associated with post-diagnosis costs were household registration, sputum smear status, reported-household economic burden, marital status. Conclusions: Although a free TB control policy is in force, patients with TB are still facing a heavy economic burden. More available interventions to reduce the financial burden on tuberculosis patients are urgently needed.</p> |
| <b>Order of Authors:</b>      | <p>Yixiang Huang</p> <p>Jianying Huang</p> <p>Xiaoting Su</p> <p>Liang Chen</p> <p>Jianwei Guo</p> <p>Weiqing Chen</p> <p>Lingling Zhang</p>                                                                                                                                                                                                                                                                                                                                                                                                                                                                                                                                                                                                                                                                                                                                                                                                                                                                                                                                                                                                                                                                                                                                                                                                                                                                                                                                                                                                                                                                                                                                                                                                                                                                                                                                       |
| <b>Opposed Reviewers:</b>     |                                                                                                                                                                                                                                                                                                                                                                                                                                                                                                                                                                                                                                                                                                                                                                                                                                                                                                                                                                                                                                                                                                                                                                                                                                                                                                                                                                                                                                                                                                                                                                                                                                                                                                                                                                                                                                                                                    |
| <b>Response to Reviewers:</b> | <p>We have upload the file "Response to editor and reviewers" as attached file, please check for clearer and more detailed responses . The following is the copy of the file:</p> <p>Additional Editor Comments (if provided):</p> <p>Dear Authors,</p> <p>In addition to the valuable points raised by the two reviewers, i have some comments from my end (some of these may be made by the reviewers as well)</p> <p>1. Abstract - most were from the migrant population - why use ' most' here while elsewhere the number % have been given?</p>                                                                                                                                                                                                                                                                                                                                                                                                                                                                                                                                                                                                                                                                                                                                                                                                                                                                                                                                                                                                                                                                                                                                                                                                                                                                                                                               |

Thanks for the editor's suggestion. We have replaced 'most' with the exact number '95%' in the abstract, which was mentioned in the line 255.

2. out of pockets expenditure? Please be careful with use of phrases (point made by the reviewer as well). Are you looking at total costs due to TB care or out of pocket expenditure. Overall in your paper, no reference was made to the WHO TB patient cost survey handbook 2016. I see that the study was among patients registered in 2013 and the WHO patient cost survey booklet was not out then. Hence, it will be nice to have a table in methods with clear operational definitions used.

We are grateful for your suggestion. In our study, we did not include the cost covered by the medical insurance, hence it is inappropriate to use the term 'out of pockets expenditure'. So we replaced it with 'cost' to make it more accurate. There are many kinds of medical insurance in China, and the patients may not be aware of whether they have certain kind of medical insurance or not, so they did not use the medical insurance to reduce their expenditure. However, in our study, the cost is measurable and comparable, so we revised it throughout this article accordingly.

According to your advice, we have added the operational definitions in table 1.

3. 2.2 Study design title should be renamed as 2.2 Study design and population Revised, thank you.

4. Anonymized data HAS to be shared and this is ESSENTIAL

Thanks for this suggestion. We have provided the anonymous data as attachment in an .xls document.

5. In the ethics statement, please mention the ethics number and the date

We are grateful for the Reviewer's suggestion. The ethical approval number is 2012-SPH021, date 9/28/ 2012.

6. Line 175-176 (regarding primary outcome) - this line is not clear

Thanks for this suggestion. We revised the definition to make it clear in line 192-193 as follows: The primary outcome variables were the mean (median) expense incurred during illness.

7. Line 191 - shouldn't it be the household's pre-TB annual income?

We appreciate your suggestion. Our study does have the limitation that we collected the range of the household's pre-TB annual income of every patient instead the exact number. However, we collected the exact number of the total annual income of every patient and as a result, we used the indicator to measure the patients' economic burden.

8. Line 204-06. Similar issues were faced by us in another study. Another analysis may be to classify the costs as catastrophic or not and then do a log binomial regression. We can present both the results. See the following paper for example, as to how the analysis was done: <https://www.ncbi.nlm.nih.gov/pubmed/30865730>

We appreciate this suggestion. As mentioned above, we did not consider the catastrophic cost as an indicator in the design phase of our study, so we are not able to conduct the analysis regarding catastrophic cost. In our revision, based on the paper given above, we improved our method of statistics by adopting 2 methods in our revised manuscript.

9. Line 206 - Bivariate means two outcomes. All the analyses presented in this paper are univariate which can be further classified into single variable (crude or unadjusted) and multivariable (adjusted) analysis.

Thanks for this suggestion. We have adopted a new method in the data analysis which is described carefully in line 221-244.

10. What about catastrophic costs, what about inequity in distribution of catastrophic costs. See this paper for example. <https://www.ncbi.nlm.nih.gov/pubmed/30173603>

We appreciate your suggestion. However, we did not adopt this professional term at the start of the study, and the annual patient income is expressed as a range instead of an exact number. As a result, it would be impossible to calculate the catastrophic costs to patients.

11. All the table and figure title have to be standalone with details about time place and person. Check for footnotes for abbreviations. All tables should be formatted again to make them presentable. For ex n and % in separate columns. n column should be right indented, (%) column should be left indented and vertical line between n and % should then be removed. Check other tables as well.

We appreciate your suggestion. We have reformatted the tables throughout the article according to your suggestions.

12. Why don't the authors look separately at factors associated with pre-dx costs and post-diagnosis costs.

Thank you for this suggestion. We have analyzed the factors associated with different period of the treatment according to your suggestion and revised the statement in the data analysis, results and discussion section on the basis of the new analysis results.

13. If the authors have outcome data, why not compare unfav out and catastrophic costs, after adjusting for potential confounders.

We appreciate your suggestion. However, we did not adopt this professional term at the start of the study, and the annual patient income is expressed as a range instead of an exact number. As a result, it would be impossible to calculate the catastrophic costs to patients.

Reviewer #1: This work is on an important area namely the economic burden due to Tuberculosis related to the EndTB strategy goal of Zero Catastrophic cost for households due to Tuberculosis. The author have drafted the manuscript well and included several important points needed for a cost analysis study.

The study utilised a follow-up methodology to capture costs during the treatment phase. The authors have also studied some factors related to costs.

While the study justification rightly draws support from the EndTB Goal of Zero Catastrophic Cost, the authors have not included Catastrophic Cost estimation in the paper, despite having all the necessary data for the calculation of the same. It is highly recommended that the authors may include catastrophic cost and accordingly the manuscript may be redrafted. If there are data available on the coping costs or mechanism, they may also be included to understand the complete picture of the economic burden faced by the patients with Tuberculosis.

We appreciate your suggestion. However, we did not adopt this professional term at the start of the study, and the annual patient income is expressed as a range instead of an exact number. As a result, it would be impossible to calculate the catastrophic costs to patients.

In our study, most of the study population were factory workers. Only 186 workers knew that they had medical insurance and 305 workers knew that they did not have any medical insurance. Other 23 workers were unaware of whether they had medical insurance or not, and at the end of the study, they did not bring about any medical care reimbursement cost. Only 34 patients provided information about medical care reimbursement cost. As a result, the proportion of cost paid by medical insurance was not included in the analysis.

#### Abstract

Though the study includes both direct and indirect costs, the abstract starts with the terminology 'expenditures' which may apparently mislead a casual reader

Follow-up method utilised may be included in the methods under the abstract

Thank you for this suggestion. We have replaced the word 'expenditures' with 'costs' to avoid misunderstanding and added the follow-up method in the abstract.

#### Methodology

In the study settings,

the following may be included, which have implications while interpreting of the results:

1. Proportion of Treatment and Retreatment Cases in the District;

Thanks for this suggestion. In the discussion section, we mentioned the proportion of treatment and retreatment cases in line 508-509 as follows: The re-treatment rate in our study was 5.84%, which is similar to that reported in other studies, with a re-treatment rate of 6.7% in Shenzhen and 6.4% in other provinces in China.

2. Actual figures of Incidence and Prevalence of Tuberculosis in Shenzhen Region/Bao'an District (lines 119-120), which needs to be specified seperately further between natives and migrants;

We appreciate your suggestion. We have added the data in line 139-141 as follows: In 2010, the prevalence rate of smear positive of native population was 19.44 per 100 000 population, and that of the migrant population was 59.96 per 100 000 population.

3. No. of TB Cases in the District during the study year among natives and migrants;

Thanks for this suggestion. We have listed the number in line 400-402 as follows: The

total number of registered active tuberculosis cases were 1317, included 76(5.8) native case and 1241(94.2%) migrant cases in 2013.

4.No. of (mandatory)visits as per the existing TB program during treatment;

Thank you for this suggestion. We have added the data in line 157.

5.Proportion of patients with TB having co-morbidities namely diabetes, HIV, lung cancer etc

We appreciate your suggestion. Because in our study, the patients with co-morbidities were excluded from the study, it is impossible to calculate the proportion of patients with TB having co-morbidities.

6.Whether Active Case finding strategy is implemented or not;

We appreciate your suggestion. In the study setting section, we have added the statements in line 132-139 to clarify the way of TB patients being found in China as follows: The hospitals were the main place finding tuberculosis case and the Center for Prevention and Cure of chronic diseases (CPC) were the local designated TB facilities in the national TB programme networks, providing treatment and managing the tuberculosis cases. The healthcare providers in general hospitals were obligate to refer the suspected cases to CPC and the basic information of suspected cases were sent to CPC. If the cases did not consulted to CPC in time, the workers of CPC would contact the suspected case. Actively cooperating with medical institutions and TB prevention and control institutions, the discovery rate and report quality was increasing by years.

7.Mean/Median household (and/or Individual) income in the region/district;

Thank you for this suggestion. We have added the median household income in Bao'an district in line 155-157 as follows: The mean household income in the region was 6,656.79 USD of 2012 according to the Statistical yearbook 2013.

8.Proportion of people in different economic categories;

We appreciate your suggestion. However, we did not have access to the detailed information about the income of different population.

9.a brief description of occupational health care provisions/model in the district relevant to TB care;

Thanks for this suggestion. In China, there is no occupational health care provisions/model focus on TB prevention only, the workers in our study were provided with the general occupational health service. For example, the workers may participant in the regular medical examination paid by the factory owner.

10.brief description of the existing intervention in the district to address economic burden faced by patients/households due to TB

We appreciate your suggestion. In line 148-151, we described the existing free policies to relief the economic burden on TB patients: The Center for Prevention and Cure of chronic diseases (CPC) is the institution authorized to provide TB diagnosis, treatment, and monitoring. The CPC provides patients with a radiologic imaging studies (X-ray) while diagnosed, and sputum smear tests during treatment, and anti-TB drugs for 6-8 months for free.

11.whether hospitalisation costs due to TB for persons with TB are covered under the existing program?

Thank you for this suggestion. The hospitalization costs due to TB was not covered under the existing program and born by the patients themselves. We have added the statements in line 148-151 to state the range of free TB policy. Since the cost regarding hospitalization is not included in the policy, it have to be borne by patients themselves.

Study Design:

Why were those aged above 59 years not included for the study? Reasons may be stated and also included/addressed in the discussion.

We appreciate your suggestion. People ages above 59 are more likely to have comorbidities which may influence the analysis of economic burden, so we excluded them. We have added the reason in line 166-167 as follows: The patients aged above 59 were excluded considering the elderly may have more commodities and those with MDR-TB were excluded too.

In the discussion, need to consider, how non-inclusion of those with morbidity namely Diabetes, HIV affected the representativeness of the study. HIV and Diabetes have programmatic implications for Tuberculosis control as well as have been shown by studies in the literature to drive the costs due to tuberculosis higher.

Thanks for this suggestion. We have discussed the influence of non-inclusion on the representativeness of our study in the limitation section in line 392-398 as follows: We

included 533 eligible patients in the survey, 19 of which were lost to follow-up. The average age of them was  $29.6 \pm 10.2$  years. The male was 14 and female was 5. One patient was with a severe symptoms appeared hemoptysis. The others were with mild or moderate symptoms like cough, chest distress and fever etc. the lost to follow-up was about 4 percent, and the general Socio-demographic and clinical characteristics of those 19 participants lost to follow-up were identical with the 514 patients. So, we considered there no much influence on our conclusion.

However, the exclusion can inevitably injure the representativeness, so we added this point as a limitation of our study in line 519-523 as follows: Our study only investigated the economic burden of patients brought by TB and those with severe co-morbidities such as AIDS, diabetes, and lung cancer were excluded. Therefore our study may reflect the economic burden faced by TB patients instead of all population.

Where those with MDR-TB excluded? Or is it that there were no drug resistant cases during the study period, which is quite unlikely. The authors have not stated whether the study is about costs due to drug sensitive tuberculosis. These needs to be clarified in title, abstract, justification (objectives), methods, and discussion.

Thank you for this suggestion. We have added the statement in the Study Design and population part in line 165-167. To illustrate the study population of our survey more accurate, we have added the particular explanation in every section accordingly.

In our study, there were only 4 patients with MDR-TB among total 514 patients. One patient failed to achieve TB suppression in the third month of treatment, and the other three patients developed drug resistance during the treatment. Doctors adjusted the medicine according to their condition and part of second-line medicine is not free. Because there were few patients with MDR-TB, we did not eliminated them from the analysis. However, they may not have much impact on the stability of the analysis.

Sample Size has not been estimated by the authors. Studies in the literature on Cost of illness have adopted different methods to calculate sample size. They may be referred to.

We appreciate your suggestion. Ahead of our study, we did not calculate the sample size we needed. We included every patient who met the inclusion criteria and agreed to take part in our survey during the study period. Analysis results showed that the sample size of our study is enough to achieve the power required.

The cost data was based on self-reporting. The authors have mentioned both in the methodology and strengths in discussion, that that a logic-check was done. Brief description of this may be provided to help readers understand how this enabled better data quality.

We appreciate your suggestion. In the Data collection section, we have explained the process of a logic-check in line 187-189 as follows: Those contradictions or missing information would be asked of patients again in a subsequent interview. We also evaluated the quality of collected data by verifying the routine health information system.

Timing of the first interview in the intensive phase could have affected the recall leading to differential recall among different participants. The data on delay between start of treatment and interview may be provided as mean and range. Similarly, it would be important to state whether the timing of multiple interviews were standardised for all patients.

Thank you for this suggestion. First interview is in the first month of intensive phase treatment. We have added the median delay time of diagnosis in line 270-271. In the limitation section, we have mentioned that recall bias could not be avoided in our study as it relied on the information self-reported by patients. Patients went to see the doctor in chronic disease station nearby on time and were followed-up during their visit.

Methodology can include explicitly the perspective from which cost was calculated, though it is understandable from the objective.

Thanks for this suggestion. We have added the illustration in the line 192 as follows: We analysis the economic burden from tuberculosis patients' perspective.

The reason for non-inclusion of guardian (companion) cost is not acceptable as the need for guardian are often higher during pre-diagnosis phase as the patients have more illness and may often make multiple visits to one or more provider before the diagnosis and start of treatment. Authors have also reported hospitalisations during pre-diagnosis period. Guardian (companion) costs needs to be included in the analysis.

We appreciate your suggestion. We regret mentioning that the companion costs was not surveyed in the study. In China, TB is a common disease and most patients do not need companions during the treatment. Another reason is that patients in our study



were surveyed in the community or chronic disease station near their home within 15 minutes' walk. So the companion costs during pre-diagnosis period may not have much impact on the outcome. We admit that it is a limitation of our study and have added the explanation in line 523-525 as follows: Second, in our study, we did not survey the information regarding companion costs although it may not have much impact on the results since most TB patients in China did not need to be companion during the treatment.

The source of questionnaire may be stated and provided.

Thanks for your suggestion. In this survey, we combined the aim of our study with standardized questionnaire used to investigate the demographic characteristic and designed the questionnaire. We have provided the questionnaire we used as attachment.

Though the study reported insurance coverage for participants, authors have not stated how reimbursements were adjusted against the costs in the analysis.

Thanks for your suggestion. In our study, most of the study population were factory workers. Only 186 workers knew that they had medical insurance and 305 workers knew that they did not have any medical insurance. Other 23 workers were unaware of whether they had medical insurance or not, and at the end of the study, they did not bring about any medical care reimbursement cost. Only 34 patients provided information about medical care reimbursement cost. As a result, the proportion of cost paid by medical insurance was not included in the analysis.

Results

Clinical characteristics including co-morbidities, pulmonary/extrapulmonary, etc to be included.

Care-seeking characteristics should include number of consultations/visits prior to diagnosis, number of providers visited and type of providers / facility visited (especially private providers /facility as it can vary from single doctor provider facility to corporate hospital)

We appreciate your suggestion. In the Socio-demographic Characteristics and Care-seeking Behaviors section, we have added the number of consultations prior diagnosis and type of facility visited in line 267-270. However, we did not collect information about the number of providers visited.

Data on whether the participant was a beneficiary of any of the existing interventions in the district to reduce the economic burden to patients due to TB, needs to be reported, including the quantum of benefit

Thanks for your suggestion. We have mentioned the coverage of the existing free TB policy in the Study setting section in line 149-151. In the second paragraph, we have also added the description of the extent of free treatment and the cost covered by the policy in line 404-406 as follows: Under the DOTS program, the CPC provide tuberculosis patients with a radiologic imaging studies (X-ray) , sputum smear tests and anti-TB drug during treatment for free amounting to 102.07 USD.

The cost during different phases of treatment could also be made available especially since authors have conducted multiple interviews through follow-up to obtain costs through the treatment period. They are important while planning interventions

Where there no hospitalisation episodes among participants during the treatment phase?

We appreciate your suggestion. Our study only investigated the cost reported by the patients occurred in the chronic disease station. There was no inpatient ward in the chronic disease station, so we did not surveyed the information about hospitalization. In Table 2, what are these Non-Tb drugs?

Thank you for this suggestion. We have added the subsidiary drugs in line 152-153. In table 3, what timeline does sputum smear test pertain to? What is the definition of household economic burden? What is the definition for degree of symptoms at diagnosis? Is it self-reported or based on clinical assessment? The Operational definition of these variables need to be included in the methodology.

Thanks for this suggestion. We have illustrated these definitions clearly in table 1.

Why insurance coverage was not included as a factor for economic burden?

Thanks for your suggestion. In our study, most of the study population were factory workers. Only 186 workers knew that they had medical insurance and 305 workers knew that they did not have any medical insurance. Other 23 workers were unaware of whether they had medical insurance or not, and at the end of the study, they did not

bring about any medical care reimbursement cost. Only 34 patients provided information about medical care reimbursement cost. As a result, the proportion of cost paid by medical insurance was not included in the analysis.

Among the factors considered for economic burden, some of them pertain to pre-diagnosis costs and other may pertain to treatment phase costs and few may be for total costs. It is recommended that these be split accordingly instead of considering everything together, as there are implications for suggesting possible interventions to reduce cost.

We appreciate this suggestion. Considering everything together is truly not legible and easy to guide practice. So we decided to analyze the factors associated with pre-diagnosis and post-diagnosis separately according to your suggestion.

Discussion

While the population of the district has 65% migrants, in the study, 95% of the study participants are migrants. This can have implications for representativeness of the study. This needs to be discussed in detail; this again importance further since it is one of the factors found to be significantly associated with economic burden as in table 3.

Thanks for this suggestion. We have discussed it carefully in line 402-405 as follows: As one of the most population of Shenzhen City and owing numbers of factories, the migrant population in Bao'an district always exceeds the average level of Shenzhen City. The total number of registered active tuberculosis cases were 1317, included 76(5.8%) native case and 1241(94.2%) migrant cases in 2013. In our study, 95 percent were migrant cases, so our study can reflect the TB condition of Bao'an district truly.

Socio-demographic and clinical characteristics of those 19 participants lost to follow-up need to be reported and the implications of the study results need to be discussed

We appreciate this suggestion. In line 395-401, we have added the statement of the influence of lost follow-ups on our outcome.

Of the 533 participants, 176 patients were reported to have been shifted to CPC with no costs for patients during pre-diagnosis period. Can description of these transfers provided and included in study setting. How this lead to no delays and no costs are important for understanding the drivers of costs/economic burden.

Thank you for this suggestion. We have added the detailed illustration in the study setting section in line 132-139.

Line 413, what are the author establishing by stating 'recall and reporting bias could not be avoided, even in this longitudinal design' The statement is self-contradictory. May need to be revised

Revised, thank you.

Figure may not be needed as this information is represented in the table 2 and is clearly evident too.

We appreciate this suggestion. We deleted figure 1 in the article.

Some Typographical Errors

Alignment of 70% in Age category 40-50 in Table 1

Subtitle Insurance to be made bold in Table 1

Weblink in line 112 may be shifted to reference and reference number provided

Title of Table 3, CNY needs to be removed

Revised, thank you.

Reviewer #2: 1. The author needs to add some more details on opportunity cost i.e, income loss by patients due to illness. Some patients were hospitalized but they have earnings from job without wage loss then how to quantify the opportunity cost? Also, variation in salary is very heterogenetic. The author needs to describe about opportunity cost.

We appreciate this suggestion. We have describe the opportunity cost in table 1 carefully. If TB patients still worked during the hospitalization, then there was no wage loss and the wage loss was 0.

2. Under background characteristics, author mentioned about insurance company, but for Out of Pocket Expenditure (OOPE), we should not mention reimbursements given by insurance company. If the patients are getting reimbursements from any type of insurance, it should be deducted from the total out of pocket expenditure.

Net out of pocket expenditure = Total expenditure - Reimbursement.

Reimbursement amount should be highlighted if possible.

Thank you for this suggestion. We realized that it was inappropriate to use the term 'out of pocket expenditure' to describe the economic burden for in our study, the cost covered by medical insurance is not included in the analysis. In our study, most of the study population were factory workers. Only 186 workers knew that they had medical

insurance and 305 workers knew that they did not have any medical insurance. Other 23 workers were unaware of whether they had medical insurance or not, and at the end of the study, they did not bring about any medical care reimbursement cost. Only 34 patients provided information about medical care reimbursement cost. As a result, the proportion of cost paid by medical insurance was not included in the analysis.

3. In methodology section, the author has mentioned the Chi-square test and Mann-Whitney analysis to examine the effect of each predictor variable on economic burden. But Chi-square test is used to know the association between predictor variables and regression analysis is used to understand the effects of predictor variables. We appreciate your suggestion. We have revised the analysis method and Chi-square test is not used this time. So we deleted it.

4. Table 3 analysis indicated that factors related to direct and opportunity costs (CNY) and in relation with the background variables. The heading should be association or differentials by background characteristics of patients and table 4 is showing the factor with regression analysis. We have revised the table titles according to your advice and thanks for your advice.

5. In table 4 multivariate analysis, only few predictor variables have been added. However, the author described in methodology section A forward stepwise approach was used to find the appropriate model. If P-value less than 0.05 is significant. It is good and recognised methods for adding the variables in regression analysis. Try also Variance inflation factor (VIF) to know the multicollinearity in predictor variables. If VIF less than 10, than the author can add the predictor variables and explore more variable as predictor variables.

Thank you for this suggestion. We have adjusted the data analysis method according to your suggestion.

Based on the above observations and looking into overall merit of the paper, few modifications in line of above points may be considered before sending it for publication.

**Additional Information:**

| Question | Response |
|----------|----------|
|----------|----------|

|                                                                                                                                                                                                                                                                                                                                                                                                                                                                                                     |                                                                                                                                                                                                                                                                                                                                                                                                               |
|-----------------------------------------------------------------------------------------------------------------------------------------------------------------------------------------------------------------------------------------------------------------------------------------------------------------------------------------------------------------------------------------------------------------------------------------------------------------------------------------------------|---------------------------------------------------------------------------------------------------------------------------------------------------------------------------------------------------------------------------------------------------------------------------------------------------------------------------------------------------------------------------------------------------------------|
| <p><b>Financial Disclosure</b></p> <p>Enter a financial disclosure statement that describes the sources of funding for the work included in this submission. Review the <a href="#">submission guidelines</a> for detailed requirements. View published research articles from <a href="#">PLOS ONE</a> for specific examples.</p> <p>This statement is required for submission and <b>will appear in the published article</b> if the submission is accepted. Please make sure it is accurate.</p> | <p>This project was funded by the National Major Science and Technology Programs in the "Twelfth Five-Year" Plan period (No. 2012ZX10004903). The funders had no role in study design, data collection and analysis, decision to publish, or preparation of the manuscript. The funders had no role in study design, data collection and analysis, decision to publish, or preparation of the manuscript.</p> |
|-----------------------------------------------------------------------------------------------------------------------------------------------------------------------------------------------------------------------------------------------------------------------------------------------------------------------------------------------------------------------------------------------------------------------------------------------------------------------------------------------------|---------------------------------------------------------------------------------------------------------------------------------------------------------------------------------------------------------------------------------------------------------------------------------------------------------------------------------------------------------------------------------------------------------------|



**Unfunded studies**

Enter: *The author(s) received no specific funding for this work.*

**Funded studies**

Enter a statement with the following details:

- Initials of the authors who received each award
- Grant numbers awarded to each author
- The full name of each funder
- URL of each funder website
- Did the sponsors or funders play any role in the study design, data collection and analysis, decision to publish, or preparation of the manuscript?
- **NO** - Include this sentence at the end of your statement: *The funders had no role in study design, data collection and analysis, decision to publish, or preparation of the manuscript.*
- **YES** - Specify the role(s) played.

\* typeset

**Competing Interests**

Use the instructions below to enter a competing interest statement for this submission. On behalf of all authors, disclose any [competing interests](#) that could be perceived to bias this work—acknowledging all financial support and any other relevant financial or non-financial competing interests.

This statement **will appear in the published article** if the submission is accepted. Please make sure it is accurate. View published research articles from [PLOS ONE](#) for specific examples.

The authors have declared that no competing interests exist.

**NO authors have competing interests**

Enter: *The authors have declared that no competing interests exist.*

**Authors with competing interests**

Enter competing interest details beginning with this statement:

*I have read the journal's policy and the authors of this manuscript have the following competing interests: [insert competing interests here]*

\* typeset

**Ethics Statement**

Enter an ethics statement for this submission. This statement is required if the study involved:

- Human participants
- Human specimens or tissue
- Vertebrate animals or cephalopods
- Vertebrate embryos or tissues
- Field research

Write "N/A" if the submission does not require an ethics statement.

General guidance is provided below. Consult the [submission guidelines](#) for detailed instructions. **Make sure that all information entered here is included in the Methods section of the manuscript.**

This study was approved by the research and ethics committee of the School of Public Health, Sun Yat-Sen University, China. The ethical approval number is 2012-SPH021, date 9/28/ 2012. Also, permission was obtained from the study site. A signed informed consent was obtained from all patients before being interviewed.

**Format for specific study types**

**Human Subject Research (involving human participants and/or tissue)**

- Give the name of the institutional review board or ethics committee that approved the study
- Include the approval number and/or a statement indicating approval of this research
- Indicate the form of consent obtained (written/oral) or the reason that consent was not obtained (e.g. the data were analyzed anonymously)

**Animal Research (involving vertebrate animals, embryos or tissues)**

- Provide the name of the Institutional Animal Care and Use Committee (IACUC) or other relevant ethics board that reviewed the study protocol, and indicate whether they approved this research or granted a formal waiver of ethical approval
- Include an approval number if one was obtained
- If the study involved *non-human primates*, add *additional details* about animal welfare and steps taken to ameliorate suffering
- If anesthesia, euthanasia, or any kind of animal sacrifice is part of the study, include briefly which substances and/or methods were applied

**Field Research**

Include the following details if this study involves the collection of plant, animal, or other materials from a natural setting:

- Field permit number
- Name of the institution or relevant body that granted permission

**Data Availability**

Authors are required to make all data underlying the findings described fully available, without restriction, and from the time of publication. PLOS allows rare exceptions to address legal and ethical concerns. See the [PLOS Data Policy](#) and [FAQ](#) for detailed information.

No - some restrictions will apply

A Data Availability Statement describing where the data can be found is required at submission. Your answers to this question constitute the Data Availability Statement and **will be published in the article**, if accepted.

**Important:** Stating 'data available on request from the author' is not sufficient. If your data are only available upon request, select 'No' for the first question and explain your exceptional situation in the text box.

Do the authors confirm that all data underlying the findings described in their manuscript are fully available without restriction?

**Describe where the data may be found in full sentences. If you are copying our sample text, replace any instances of XXX with the appropriate details.**

- If the data are **held or will be held in a public repository**, include URLs, accession numbers or DOIs. If this information will only be available after acceptance, indicate this by ticking the box below. For example: *All XXX files are available from the XXX database (accession number(s) XXX, XXX).*
- If the data are all contained **within the manuscript and/or Supporting Information files**, enter the following: *All relevant data are within the manuscript and its Supporting Information files.*
- If neither of these applies but you are able to provide **details of access elsewhere**, with or without limitations, please do so. For example:

*Data cannot be shared publicly because of [XXX]. Data are available from the XXX Institutional Data Access / Ethics Committee (contact via XXX) for researchers who meet the criteria for access to confidential data.*

*The data underlying the results presented in the study are available from (include the name of the third party*

Data cannot be shared publicly because the study samples have signed the Privacy Policy during our study. The Privacy Policy precludes us from copying or spreading the original data.

Centre for Tuberculosis Control of Guangdong Province imposed the Privacy Policy that the study samples signed.  
Contact Email: bambdd@126.com  
Address: Centre for Tuberculosis Control of Guangdong Province, Guangzhou, 510630, China

Shenzhen City Baoan District Chronic Disease Prevention and Treatment Hospital will be available to field future data requests.  
Contact Email: mby@baoan.gov.cn  
Address: Shenzhen City Baoan District Chronic Disease Prevention and Treatment Hospital, Shenzhen 518101, China

*and contact information or URL).*

- This text is appropriate if the data are owned by a third party and authors do not have permission to share the data.

\* typeset

Additional data availability information:



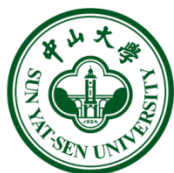

# 中山大學 公共衛生學院

## School of Public Health, Sun Yat-Sen University

74 Zhongshan Road 2, Guangzhou 510080 P.R. China Tel:(8620)87330678 Fax:(8620)87335498

Dear editor,

We are researchers from Sun Yat-sen University in China. We want to submit an original research article entitled “Analysis on the economic burden of diagnosis and treatment of tuberculosis(TB) patients in the TB control demonstration area of China”, which we wish to be considered for publication in *PLOS ONE*. We believe that several aspects of this manuscript will make it interesting to general readers of your journal.

First, unlike other previous studies, the study is representative of most tuberculosis patients of Shenzhen City, the south-east of China, because about 50% of all cases under DOTS came from the study site. Moreover, since most of the patients enrolled into the study were under DOTS programme regularly and be investigated with strict processes, the results can mirror the economic burden faced by most TB patients in China faithfully. Second, our study suggests that although free TB control policy is implemented, TB patients are still facing a heavy economic burden. More available interventions to reduce financial burden for tuberculosis patients are urgent. Above all, the results of the study can provide a good reference for other developing countries in health policy making and promote public health, especially when facing the risk of TB resurgence in the fast-growing world. This study will be meaningful and fits the aim and scope of *PLOS ONE* well.

We confirm that neither the manuscript nor any parts of its content are currently under consideration or published in another journal. We would be very happy if the manuscript will be evaluated by your Editorial Board members for publication in *PLOS ONE*.

Best regards,

A handwritten signature in blue ink that reads "Yixiang Huang".

MD, PhD

Associate Professor & Vice Chair

Department of Health Policy & Management

School of Public Health, Sun Yat-sen University

74 Zhongshan 2<sup>nd</sup> Road, Guangzhou, Guangdong, P.R.China, 510080

Email: huangyx@mail.sysu.edu.cn

Tel: +8620 8733 3239

Suggested academic editors:

1.

Helen Suzanne Cox

University of Cape Town Institute of Infectious Disease and Molecular Medicine  
SOUTH AFRICA

2.

Erik Schouten

Health Programs Group  
MALAWI

3.

Hemant Deepak Shewade

International Union Against Tuberculosis and Lung Disease  
INDIA

4.

Lei Gao

Chinese Academy of Medical Sciences and Peking Union Medical College  
CHINA

1 ~~Analysis of the Economic Burden of Diagnosis~~  
2 ~~and Treatment on Patients with non-drug~~  
3 ~~resistance Tuberculosis (TB) in the TB Control~~  
4 ~~Demonstration Area of China~~

5 ~~Yixiang Huang<sup>1</sup>#, Jianying Huang<sup>2</sup>#, Xiaoting Su<sup>1</sup>, Liang Chen<sup>3</sup>, Jianwei Guo<sup>1</sup>, Weiqing~~  
6 ~~Chen<sup>4</sup>\* and Lingling Zhang<sup>5</sup>~~

7 <sup>1</sup> ~~Department of Health Policy and Management, School of Public Health, Sun Yat-sen University,~~  
8 ~~Guangzhou, 510080, China~~

9 <sup>2</sup> ~~Guangdong Women and Children Hospital, Guangzhou, 511442, China~~

10 <sup>3</sup> ~~Centre for Tuberculosis Control of Guangdong Province, Guangzhou, 510630, China~~

11 <sup>4</sup> ~~Department of Medical Statistics and Epidemiology, School of Public Health, Sun Yat-sen University,~~  
12 ~~Guangzhou, 510080, China~~

13 <sup>5</sup> ~~Department of Nursing, College of Nursing and Health Sciences, University of Massachusetts, Boston~~  
14 ~~02125-3393, USA~~

15 ~~\*Correspondence: chenwq@mail.sysu.edu.cn~~

16 ~~# Yixiang Huang and Jianying Huang contributed equally to this work.~~

17  
18  
19  
20  
21  
22  
23  
24  
25  
26  
27  
28  
29  
30  
31  
32  
33  
34  
35  
36  
37  
38  
39  
40  
41

42

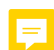

43 **Abstract:** ~~Background:~~ ~~Illness-related costs experienced~~ by patients produce a severe  
44 economic impact on households, especially those of poor families. Few studies have  
45 investigated the full costs, including direct and opportunity costs, at the patient and  
46 household levels in the south-east of China. Methods: A case follow-up study was conducted  
47 in the Bao'an district of Shenzhen City, China. Eligible new and re-treated individuals with  
48 pulmonary TB during January 1<sup>st</sup> 2013 to June 30<sup>th</sup> 2013 were enrolled. Medical and  
49 non-medical costs as well as income loss were calculated in pre-diagnosis and post-diagnosis  
50 periods, respectively. **Factors associated** pre-diagnosis costs and post-diagnosis costs were  
51 explored respectively with a linear regression model. Results: Of the total 514 TB patients  
52 enrolled, **most** were from the migrant population, and 65% were males (336), with a mean  
53 age of 32.25 ( $\pm 10.11$ ) years. The median **pre-diagnosis direct** costs, direct post-diagnosis costs,  
54 and post-diagnosis medical and non-medical costs were 79USD, 748USD, 542USD, and  
55 150USD (6.2897CNY = 1USD, 2013) per patient, respectively. **The median total cost of TB**  
56 **treatment** per patient was 1218USD, corresponding to 26% of patients' annual income  
57 pre-illness. **Variables associated with pre-diagnosis costs included number of times visiting**  
58 **health facilities, whether in hospital due to TB, education, History of TB. Variables**  
59 **associated with post-diagnosis costs were household registration, sputum smear status,**  
60 **reported-household economic burden, marital status.** Conclusions: Although a free TB  
61 control policy is in force, patients with TB are still facing a heavy economic burden. More  
62 available interventions to reduce the financial burden on tuberculosis patients are urgently  
63 needed.

64 **Keywords:** Tuberculosis; cost of illness; economic burden; China

65

---

66 **1. Introduction**

67 Tuberculosis (TB) is one of the top 10 causes of death worldwide as well as being the  
68 leading cause from a single infectious agent (more than HIV/AIDS). According to 2018 global  
69 estimates, there were almost 10 million new cases of TB and 1.3 million TB deaths in 2017 [1].  
70 The high prevalence of TB is always a critical public health problem in China, accounting for  
71 the second highest number of cases in the world except in India, with 778,000 identified cases  
72 of TB in 2017 [1]. Since 1990, the WHO-recommended directly observed treatment + short  
73 course chemotherapy (DOTS) strategy to control this epidemic has been implemented by the  
74 Chinese government under the National Tuberculosis Control Program [2], whose guidelines  
75 include free anti-TB drugs for 6 months to new patients with TB and for 8 months to  
76 re-treatment patients **in addition to multi-drug resistant/ extensively-drug resistant**  
77 **(MDR/EXDR) patients.** Tests include one free X-ray test for individuals suspected of having  
78 TB at their first visit, one free sputum smear test for those whose X-ray tests are abnormal and  
79 free sputum smear tests for patients undergoing free anti-TB treatment. With the development  
80 of molecular biology, a new testing method called GeneXpert/RIF (abbreviated as Xpert) is  
81 recommended. With a shorter time of testing, higher sensitivity, and higher specificity, Xpert  
82 has been rapidly adopted for clinical diagnoses in China [3].

83 However, many investigators have pointed out that both the TB patients and their  
84 households bear a heavy economic burden. Even the free DOTS control strategy is far from  
85 sufficient [4, 5]. Tuberculosis is a well-known poverty-related disease, an association that has  
86 been well-established at both patient and household levels, usually related to the  
87 disadvantages of socio-economic status. In particular, among those who come from rural and  
88 poor districts, the scarcity of health resources and their poor economic condition place them in

89 a more serious situation [6]. The financial aspect is a major factor contributing to  
90 health-care-seeking behavior among Chinese patients. Delayed and repeated visits to clinics  
91 before diagnosis, the over-prescribing of drugs, and prolonged treatment are common [7].  
92 Patients must bear too much economic burden, such as, for example, medical and  
93 transportation costs, and income loss, precluding them from further adhering to treatment and  
94 resulting in treatment failure [5].

95 There have been many studies on the cost-effectiveness of different TB control strategies,  
96 mainly investigating the costs to the health system in the Eastern, Middle, and Western  
97 Regions of China. These studies focused mainly on the effectiveness of medical insurance for  
98 coping with the costs of illness as well as patient compliance with drug regimens [5, 8].  
99 However, far fewer studies have measured the costs to patients and households or the full  
100 costs, including direct and opportunity costs, from the onset of symptoms to the end of  
101 treatment in the south-east of China. To achieve the health-related Sustainable Development  
102 Goal (SDG) proposed by the United Nations and the goal of ending the TB epidemic by 2035  
103 proposed by WHO, whose last target reads “No TB patients and their families face  
104 Catastrophic costs (>20% of annual household income)” [9], all TB patients should receive  
105 accessible and affordable standard medical treatment. Therefore, the present study was  
106 performed to evaluate the out-of-pocket direct costs as well as productivity lost related to  
107 illness. Potential factors associated with these costs were also explored. We aimed to establish  
108 the evidence base for interventions that can contribute to TB-related cost reduction, increase  
109 patient adherence to treatment, and treatment success rates. There is a need to document the  
110 full economic burden of TB care borne by patients and their households.

## 111 2. Materials and Methods

### 112 2.1. Study Setting

113 Shenzhen City is one of the most prosperous regions in China, with a Gross Domestic  
114 Product (GDP) of nearly 269 billion CNY in 2019. Its estimated population is over 13 million,  
115 with the migrant population constituting 65.3% while this rate is 82.4% in Bao'an district of the  
116 total regional population according to the Shenzhen statistical yearbook 2019. The mean  
117 household income in the region was 6,656.79 USD of 2012 according to the Statistical yearbook  
118 2013. The rapid economic growth in the city, leading to higher income levels, attracts numerous  
119 young migrant workers, mostly from remote poor areas exposed to substandard conditions  
120 such as lower societal status, poor standard of living, limited health knowledge, and less  
121 accessibility to health services, thus creating favorable conditions for infection with  
122 Mycobacterium tuberculosis and progression to disease. Such conditions delay individuals from  
123 seeking health care, resulting in advanced disease and continued transmission of TB in the  
124 community. Although analysis of recent data has shown a decreasing incidence of TB in the  
125 Shenzhen region, its prevalence in the Bao'an district, where a heavy concentration of migrant  
126 workers contributes to a high TB case load, is still high.

127 The Bao'an district implemented the 10-year World Bank TB project in 1992, brought the  
128 migrant population into the National TB control program (NTP), and adapted the DOTS  
129 strategies. After this ended in 2002, the Shenzhen TB control project in Guangdong province was  
130 launched. Then, as a representative of Guangdong province, the Bao'an district was selected as  
131 one of the seven counties to implement the fifth round of the globally funded TB control project.  
132 Up to 2010, the Bao'an district was selected by the China Ministry of Health as the site of a  
133 demonstration area for a tuberculosis control model. The hospitals were the main place finding  
134 tuberculosis case and the Center for Prevention and Cure of chronic diseases (CPC) were the  
135 local designated TB facilities in the national TB program networks, providing treatment and  
136 managing the tuberculosis cases. The healthcare providers in general hospitals were obligate to  
137 refer the suspected cases to CPC and the basic information of suspected cases were sent to CPC.  
138 If the cases did not consult to CPC in time, the workers of CPC would contact the suspected



139 case. Actively cooperating with medical institutions and TB prevention and control institutions,  
140 the discovery rate and report quality was increasing by years. In 2010, the prevalence rate of  
141 smear positive of native population was 19.44 per 100 000 population, and that of the migrant  
142 population was 59.96 per 100 000 population and the cure rates for both native and migrant  
143 patients were 94.79% and 82.91%, respectively [10].

144 The main health-care sources in China are district public health facilities organized into  
145 three tiers of referral: primary (Center for Prevention and Cure of chronic diseases), secondary  
146 (sub-district prevention and care dispensaries), and tertiary (Community health-care stations)  
147 [11]. The DOTS program means directly observed treatment +short course chemotherapy for  
148 non-inpatient tuberculosis patients, and is available only in public health facilities, where  
149 patients have free access to diagnostic and treatment services. The Center for Prevention and  
150 Cure of chronic diseases (CPC) is the institution authorized to provide TB diagnosis, treatment,  
151 and monitoring. The CPC provides patients with a radiologic imaging studies (X-ray) while  
152 diagnosed, and sputum smear tests during treatment, and anti-TB drugs for 6-8 months for free.  
153 Patients must regularly return to CPC every month for health checks after starting to take  
154 anti-TB drugs until the treatment is over. Generally, the numbers of times of subsequent  
155 consultations are 5 and 7 to newly-patients and re-treated patients respectively. The costs of  
156 every month including auxiliary examinations and subsidiary drugs like heptaninca, gastric  
157 medicine, and immunopotentiator etc. are not free. The sub-district prevention and care  
158 dispensaries and Community health-care stations coordinating with the CPC are obligated to  
159 perform routine monitoring, referral, and supervision. Adherence is directly monitored by the  
160 health workers of Community health-care stations for daily drug intake, adverse reactions, and  
161 other activities of admitted patients. If patients fail to take a specific drug for 2 days, the workers  
162 will contact them by telephone to ensure that the patients complete their treatment.

163

## 164 2.2. Study Design and population

165 A case follow-up study was conducted in the Bao'an district with an ongoing NTP-DOTS  
166 project. Newly diagnosed and re-treated TB patients aged 15-59 years old, who registered in the  
167 CPC during 1 January 2013 to June 2013, were included and were followed up until the  
168 completion of a 6- to 8-month treatment course. Those with severe co-morbidities such as AIDS,  
169 diabetes, and lung cancer and those who refused to accept investigation were excluded. The  
170 patients aged above 59 were excluded considering the elderly may have more comorbidities  
171 and those with MDR-TB were excluded too. Transferred patients were also excluded from the  
172 study, since information on previous costs was not available. The operational definition of  
173 various costs and indicators were summarized in table 1.

174

## 175 2.3. Data Collection

176 All eligible cases were subjected to five (new patients) or seven (re-treatment patients)  
177 interviews at the Department of Tuberculosis Prevention and Control in Bao'an CPC. A  
178 structured questionnaire was used, covering general demographic and socio-economic  
179 characteristics, disease history, care-seeking process, treatment behaviors, and costs of pre- and  
180 post-diagnosis. Self-reported economic status information was collected based on different  
181 localities with various levels of development. The first interview was at the first month of  
182 intensive phase of treatment, when patients' retrospective care-seeking history and related  
183 expenditures, including pre-diagnosis, starting from the time point when the patients  
184 experienced the first symptoms, and the intensive phase related costs, were collected. The other  
185 four or six interviews occurred monthly when patients came for regular re-examinations. The  
186 patients' TB care experiences and transportation fee, supplementary food cost, and foregone  
187 income of patients and companions were collected in follow-ups.

188 A graduate student with two locally recruited research assistants, health workers who had  
189 participated in a standardized training session, conducted those interviews. A logic check of all

190 data collected was undertaken to determine if there were any contradictions or missing  
 191 information. Those contradictions or missing information would be asked of patients again in a  
 192 subsequent interview. We also evaluated the quality of collected data by verifying the routine  
 193 health information system.

194

#### 195 2.4. Measurements and Definitions

196 We analyzed the economic burden from tuberculosis patients' perspective. The primary  
 197 outcome variables were the mean (median) expense incurred during illness. Information on  
 198 costs was ascertained for different periods, summarized as pre- and post-diagnosis.

199 Direct costs included all costs of patients and companions attributable to their illness [12],  
 200 which consisted of the medical costs related to TB diagnosis and treatment (clinical and  
 201 hospitalization expenses), and non-medical costs incurred by patients or companions, such as  
 202 transportation to health facilities and supplementary food. Opportunity costs referred to the  
 203 income lost by patients and their companions associated with time lost off work. Assuming 30  
 204 working days per month, we evaluated the value in terms of money for each day, and opportunity  
 205 costs was calculated as the value per day multiplied by the length of time off work due to  
 206 illness. The income lost before diagnosis was calculated based on each patient's monthly wage  
 207 prior to the onset of TB. The lost income after diagnosis was calculated based on the monthly  
 208 wage if patients were still on working during illness. After diagnosis, patients were asked about  
 209 the actual lost income that they and their companions had experienced due to absence from  
 210 their usual income-generating activities at every interview. These monthly income reductions  
 211 were then summed. The income lost by companions pre-diagnosis was not included in the  
 212 analysis, since only a few such losses occurred. The time spent on daily drug intake was also not  
 213 calculated, because most patients took drugs on their way to work or at the community  
 214 health-care stations close to their homes.

215 The economic burden was then analyzed as a proportion of patients' total annual income.  
 216 The free services provided during diagnosis and treatments were not included in the medical  
 217 costs. Information about costs after diagnosis was extracted from the information system of the  
 218 study facility. Information on costs covered by insurance could not be obtained, since the  
 219 insurance had not been settled at the end of the interview.

220 **Table 1.** Operational definition of study participants and TB treatment cost in the study  
 221 of Bao'an district, Shenzhen City, China, 2013

| Terminology                   | Definition                                                                                                                                                                                                                                 |
|-------------------------------|--------------------------------------------------------------------------------------------------------------------------------------------------------------------------------------------------------------------------------------------|
| Study participants            | All newly diagnosed and re-treated TB patients accepted treatment in CPC during 1 January 2013 to June 2013                                                                                                                                |
| Study participants ineligible | Patients with severe co-morbidities such as AIDS, diabetes and lung cancer with multidrug-resistant TB, aged >59 were excluded.                                                                                                            |
| Pre-diagnosis costs           | Costs between symptom onset and diagnosed as TB                                                                                                                                                                                            |
| Post-diagnosis costs          | Costs from treatment initiation up to treatment completion                                                                                                                                                                                 |
| Direct medical costs          | Expenses of medical examinations and medicines linked to TB diagnosis and treatment                                                                                                                                                        |
| Direct non-medical costs      | Costs for transport, food expenditures ,nutrition supplements due to TB                                                                                                                                                                    |
| Direct cost                   | Direct medical costs + direct non-medical costs                                                                                                                                                                                            |
| Opportunity costs             | Patients and companions' lost income due to TB-related time off work during the TP episode. The pre-diagnosis opportunity cost was estimated using the time off work multiplied by the reported individual income prior to the onset of TB |

|                                     |                                                                                                                                                                                                                                                                                                                    |
|-------------------------------------|--------------------------------------------------------------------------------------------------------------------------------------------------------------------------------------------------------------------------------------------------------------------------------------------------------------------|
| Total costs                         | Direct costs + opportunity costs                                                                                                                                                                                                                                                                                   |
| Sputum smear test                   | At the time of diagnosing conducted one sputum smear test, the outcome included negative and positive.                                                                                                                                                                                                             |
| Household economic burden           | Self-reported economic burden due to TB treatment                                                                                                                                                                                                                                                                  |
| The degree of symptoms at diagnosis | The patients self-reported with different symptoms at diagnosis were divided into four categories. 1. None: no symptoms; 2.mild: with symptoms included cough, expectoration and dyspnea, night sweat, and debilitation; 3. Moderate: symptoms with fever and chest distress; 4. severe: symptoms like hemoptysis. |
| Interruption of treatment           | Treatment interruption is defined as any interruption of treatment for at least one day but for < 8 consecutive weeks                                                                                                                                                                                              |

222

223

### 224 2.5. Data Analysis

225 The data were double-entered with EpiData 3.1 software (EpiData Association, Odense,  
 226 Denmark) for each patient, and cost summaries and analyses were performed by SPSS 20.0  
 227 software. Continuous variables like direct costs, opportunity costs were summarized as means  
 228 ( $\pm$  standard deviation [SD]) or medians (IQR), while categorical variables were summarized as  
 229 proportions. Group comparisons were made with the *rank correlation* for median, the  
 230 Mann-Whitney test or Kruskal-Wallis test for medians in two or multiple groups if their  
 231 distribution were non-normal. We also did a confounder adjusted analysis for the association  
 232 between pre-diagnosis costs or post-diagnosis costs and predictor variables respectively using  
 233 linear regression. The costs were log transformed as they were not normally distributed. To  
 234 explore more variables as predictor variables, the possible variables were all considered in the  
 235 linear regression model irrespective the value in univariate group comparisons. A forward  
 236 stepwise approach was used to find the appropriate model. Association was summarized using  
 237 Beta coefficient (95% CI), *P*-value less than 0.05 were significant. Considering the  
 238 multicollinearity in predictor variables, we calculated variance inflation factor (VIF) at the  
 239 same time [13], If VIF was less than 10, then the predictor variables were included in the linear  
 240 model.

241 Considering in applying and interpreting the results of hypothesis testing in a  
 242 log-transformed data on actual data (non-log transformed) [14]. Hence, we also conducted a  
 243 confounder-adjusted association between costs and predictor variables using generalized linear  
 244 model (logistic regression, the costs were divided as binomial variables based on median value.  
 245 To explore more variables as predictor variables, the possible variables were all considered in  
 246 the linear regression model irrespective the value in univariate group comparisons. Association  
 247 was summarized using  $\exp(\beta)$  coefficient (95% CI), *P*-value less than 0.05 were significant.  
 248

### 249 2.6. Ethics Approval

250 This study was approved by the research and ethics committee of the School of Public  
 251 Health, Sun Yat-Sen University, China. Also, permission was obtained from the study site. A  
 252 signed informed consent was obtained from all patients before being interviewed.

## 253 3. Results

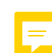

### 254 3.1. Socio-demographic Characteristics and Care-seeking Behaviors

255 The present study surveyed 533 eligible pulmonary tuberculosis patients who with no  
 256 co-morbidity, 19 of whom were lost to follow-up, one of whom died from another disease, and  
 257 18 of whom moved to other provinces. The rate of loss to follow-up was nearly 4%. Among the

258 514 patients receiving anti-TB treatment, 30 were re-treatment patients, and 95% were  
259 members of the migrant population from all over the country. The average age was 32.25 ±  
260 10.11 years, 65% (336/514) of the patients were male, and 35% were female. The mean monthly  
261 income of patients before illness was 448USD, about 71.4% of patients had monthly household  
262 income between 317.98 to 635.96 USD. One hundred seventy-six patients were identified  
263 when they accepted health check-ups required by their work units, and were then transferred  
264 to the CPC. They were diagnosed at CPC immediately without consulting to other facilities,  
265 so their pre-diagnosis costs were not calculated. Three hundred thirty-eight patients were  
266 registered as a result of clinical consultation. Among the 338 patients, the median delay time  
267 of visiting doctors, defined as the period between onset of symptoms and first contact with a  
268 health-care provider, was 11 days (IQR 3-30), for reasons such as having no time, being  
269 unaware of the presence of tuberculosis, and lacking money. The median number of  
270 consultations prior to diagnosis was 3 (1, 20). The number of first visit in  
271 community healthcare center and general hospital was 71(21%) and 136(40.2) respectively.  
272 Only 48 (14%) patients initially visited a public facility, while the others reported that they first  
273 consulted either a drug shop or private clinic or did nothing. Then median delay time of  
274 diagnosis was about 7 (0,200) days.

275

### 276 3.2. *Pre-diagnosis Direct Costs*

277 Among the 338 patients who incurred costs due to consultation, the median outpatient  
278 medical cost incurred pre-diagnosis was 64USD (IQR 24-159) per patient. Twenty-two patients  
279 were admitted to the hospital before TB was diagnosed. Hospital patients incurred a  
280 substantial higher out-of-pocket expenditure. The median hospital expenditure was 477USD  
281 (IQR 318-823). The non-medical costs refer to transportation and accommodation fees. This  
282 study surveyed only the transportation fees for patients before diagnosis. The median  
283 transportation fee was 2USD (IQR 0-8). Costs due to the prescribing of non-TB drugs and  
284 diagnosis costs accounted for a high proportion of direct expenditures in the pre-diagnosis  
285 period (97.0%).

### 286 3.3. *Post-diagnosis Direct Costs*

287 A patient's average number of health-care visits after TB was diagnosed was 9.7, with a  
288 maximum of 15 visits. The direct costs after TB was diagnosed were 748USD (IQR 567-987);  
289 the average cost for one visit was 77USD. Median medical cost was 542USD (IQR 465-618),  
290 then we further analyzed what constituted medical costs. Median costs for examinations and  
291 non-TB drugs were 307USD (IQR 273-341) and 211USD (IQR 166-265), respectively, which  
292 were clearly the most robust components, accounting for 55% and 40% of medical costs,  
293 respectively. Meanwhile, the auxiliary drugs, such as liver/kidney protection drugs and  
294 immunopotentiators, constituted the main part of non-TB drugs, with a median cost of  
295 174USD (IQR 135-219), accounting for 83% of the non-TB drug costs.

296 The non-medical costs in the post-diagnosis period included transportation generated by  
297 patients and companions and supplementary food for patients. The median transportation  
298 cost was 19USD (IQR 10-31); the average cost for a single event was 3USD. Among the  
299 surveyed patients, 196 were escorted during treatment by their family or friends, and the  
300 median transportation cost was 5USD (IQR 2-13). About 340 patients improved nutrition with  
301 supplementary food, and the median cost was 302USD (IQR 127-489). The non- medical costs  
302 totaled 150USD (IQR 29-410). Clearly, the non-medical costs were relatively low (Table 2).The  
303 direct costs of intensive phase (the first two month ) and consolidation phase(the next 4 or 6  
304 month) 210.58(164.87,279.66) USD and 516.48(391.91,703.39) USD respectively. The direct  
305 costs of consolidation phase accounted for 70.7% of total pre-diagnosis direct costs.

### 306 3.4. *Opportunity Costs*

307 Only 49 patients reported income lost while away from work due to seeking health care  
 308 before diagnosis. Income lost by those patients, incurred during the pre-diagnosis period up to  
 309 standard anti-TB treatment, was 32USD (IQR 16-83). Most of the opportunity costs were from  
 310 lost income after TB was diagnosed (Table 2), because most patients were fired or could not  
 311 physically continue working. For the pre-diagnosis period, the income loss was calculated  
 312 based on each patient's daily income before illness (median, 32USD), multiplied by the total  
 313 time the patient was out of work due to illness (median, 2 days,  $n = 49$ ), mainly due to travel  
 314 and consultation time at different health-care facilities. For the post-diagnosis period, the  
 315 monthly income reduction for a complete treatment cycle was summed. The income lost at  
 316 two stage of treatment was 31.80(0, 63.60) USD and 127.19(38.16, 683.66) USD. Most income  
 317 lost came from the consolation phase. The opportunity cost during consolidation period  
 318 accounted for 79% of total post-diagnosis opportunity cost. The time lost due to daily drug  
 319 intake was not calculated in the current study.

### 320 3.5. Total Patient and Household Costs

321 The sum of median direct and opportunity patient and household costs was 1218USD  
 322 (IQR 826-1963), which corresponds to 26% of annual individual incomes before TB illness  
 323 (4770USD). The direct costs accounted for 61% of the total costs, and the ratio of direct to  
 324 opportunity costs was 1.58. About 88.2% (1074/1218) of costs were encountered after the  
 325 patients were diagnosed and accepting free DOTS treatment.

326 **Table 2. Median** direct and opportunity costs of TB patients during different episodes of  
 327 treatment in the study of Bao'an district, Shenzhen City, China, 2013

| Timing and Types of Costs                       | Patient-reported costs during this Period |            |                      | All Patients***<br>( $n = 514$ ) |
|-------------------------------------------------|-------------------------------------------|------------|----------------------|----------------------------------|
|                                                 | Number <sup>*</sup>                       | %          | Median** (IQR range) |                                  |
| <b>Pre-diagnosis</b>                            |                                           |            |                      |                                  |
| <b>Direct costs</b>                             |                                           |            |                      |                                  |
| Outpatient medical costs                        | 338                                       | 66         | 64 (24-159)          | 19 (0-79)                        |
| Hospital costs                                  | 22                                        | 4          | 477 (318-823)        | 0 (0-0)                          |
| Transportation costs                            | 338                                       | 66         | 2 (0-8)              | 0 (0-3)                          |
| <b>Pre-diagnosis direct costs<sup>^</sup></b>   |                                           |            |                      | <b>79 (24-191)</b>               |
| <b>Opportunity costs</b>                        |                                           |            |                      |                                  |
| Foregone income before diagnosis                | 49                                        | 10         | 32 (16-83)           | 0 (0-0)                          |
| <b>Median cost of pre-diagnosis<sup>d</sup></b> |                                           |            |                      | <b>79 (25-204)</b>               |
| <b>Post-diagnosis</b>                           |                                           |            |                      |                                  |
| <b>Direct costs</b>                             |                                           |            |                      |                                  |
| <b>Medical costs</b>                            | <b>514</b>                                | <b>100</b> | <b>542 (465-618)</b> | <b>542 (465-618)</b>             |
| Examination                                     | 514                                       | 100        | 307 (273-341)        | 307 (273-341)                    |
| Non-TB drugs                                    | 514                                       | 100        | 211 (166-265)        | 211 (166-265)                    |
| Auxiliary drugs                                 | 514                                       | 100        | 174 (135-219)        | 174 (135-219)                    |
| Others                                          | 514                                       | 100        | 21 (20-24)           | 21 (20-24)                       |
| <b>Transportation</b>                           |                                           |            |                      |                                  |
| For patients                                    | 514                                       | 100        | 19 (10-31)           | 19 (10-31)                       |
| For companions                                  | 196                                       | 38         | 5 (2-13)             | 0 (0-3)                          |



|                                      |     |    |                |                        |
|--------------------------------------|-----|----|----------------|------------------------|
| <b>Supplementary food</b>            | 340 | 66 | 302 (127-489)  | 127 (0-376)            |
| <b>Post-diagnosis direct costs</b>   |     |    |                | <b>748 (567-987)</b>   |
| <b>Opportunity costs</b>             |     |    |                |                        |
| Foregone income of patients          | 402 | 78 | 241 (90-1,181) | 114 (24-797)           |
| Foregone income of companions        | 196 | 38 | 39 (16-84)     | 0 (0-24)               |
| <b>Median cost of post-diagnosis</b> |     |    |                | <b>1074 (745-1820)</b> |
| <b>Total direct cost</b>             |     |    |                | <b>833 (609-1132)</b>  |
| <b>Total opportunity cost</b>        |     |    |                | <b>157 (57-855)</b>    |
| <b>Median cost of all periods</b>    |     |    |                | <b>1218 (826-1963)</b> |

328 \*Total number of patients, 514.

329 \*\*The average cost among patients who generated this kind of costs in row 2.

330 \*\*The average cost for all patients (514).

331 ^Pre-diagnosis direct cost = direct costs + transportation costs. Median cost of  
332 pre-diagnosis = direct costs + opportunity costs.

### 333 3.6. The association of pre-diagnosis costs among tuberculosis patients

334 The socio-demographic and care-seeking level characteristics of pre-diagnosis costs  
335 were summarized in table 3. Those re-treated patients had more costs compared with  
336 newly patients (P=0.05) and patients who were in hospital due to tuberculosis generated  
337 more costs (P<0.0001). It seemed that the more number of times visiting to health-care  
338 facilities (P=0.05), the longer of delay of diagnosis(P<0.0001) and delay of first visiting  
339 health-care facilities when symptom onset.

340 The direction and significance of association between the pre-diagnosis costs and the  
341 number of times visiting to health-care facilities, whether in hospitals due to tuberculosis  
342 before diagnosis did not changed after a confounder adjusted analysis in linear regression  
343 analysis . However, the increase in delay of diagnosis was not found to be statistically  
344 significant in adjusting analysis (Table 4). But we found those who received higher education  
345 or occupied in national civil servant/services /retired staff might expense more before  
346 diagnosis in the linear regression analysis too. In the corresponding generalized linear  
347 regression, number of times visiting health-care facilities was found to be related  
348 pre-diagnosis costs statically significant (P<0.0001). (Table 5)

### 349 3.7 The association of post-diagnosis costs among tuberculosis patients

350 The socio-demographic characteristics of post-diagnosis costs had been depicted in Table  
351 6. Migrant population might have more costs during the tuberculosis treatment compared  
352 with native population (p=0.003). There were difference of costs after diagnosis as TB among  
353 different education level patients (P=0.039). Those who perceived that the TB imposed  
354 economic burden to household might have more expenses on the treatment (P=0.021).The  
355 status of sputum smear test at the time of diagnosis was positive generate more costs  
356 compared to the negative (P<0.0001).

357 After a confounder adjusted analysis, the direction and significance of association of  
358 post-diagnosis costs and the household registration (migrant or native residents), reported

359 economic burden of households, sputum smear status did not changed (Table 7). The  
 360 divorced or widowed patients had more costs compared to the unmarried in the linear  
 361 regression analysis (p=0.044). In the corresponding generalized linear regression, only  
 362 sputum smear status adopted in the model. (P<0.0001). (Table 8)  
 363

364 **Table 3. Association of pre-diagnosis costs by background characteristics and**  
 365 **care-seeking behaviors among tuberculosis patients enrolled in the study of Bao'an district,**  
 366 **Shenzhen City, China, 2013**

| variables                                                    | Number | %      | median(IQR range) of pre-diagnosis cost | P            |
|--------------------------------------------------------------|--------|--------|-----------------------------------------|--------------|
| <b>Gender</b>                                                |        |        |                                         |              |
| Female                                                       | 116    | 34.32  | 68.37(18.28,166.14)                     | 0.121        |
| Male                                                         | 222    | 65.68  | 81.48(31.8,240.39)                      |              |
| <b>age</b>                                                   | 338    | 100.00 | 79.5(25.2,204.43)                       | <b>0.723</b> |
| <b>Household registration</b>                                |        |        |                                         |              |
| Native patients                                              | 21     | 6.21   | 34.98(23.85,158.99)                     | 0.15         |
| Migrant patients                                             | 317    | 93.79  | 79.5(25.44,205.63)                      |              |
| <b>Marital status</b>                                        |        |        |                                         |              |
| unmarried                                                    | 105    | 31.07  | 79.5(23.85,238.49)                      | 0.158        |
| married                                                      | 217    | 64.20  | 79.5(25.44,190.79)                      |              |
| widowed/divorced                                             | 7      | 2.07   | 79.5(58.03,203.67)                      |              |
| others                                                       | 9      | 2.66   | 50.88(19.71,317.98)                     |              |
| <b>Education</b>                                             |        |        |                                         |              |
| Primary/illiterate                                           | 48     | 14.20  | 72.5(17.01,168.53)                      | 0.171        |
| Junior high school                                           | 139    | 41.12  | 66.78(23.85,164.55)                     |              |
| Senior high school                                           | 110    | 32.54  | 79.5(31.8,182.84)                       |              |
| college or above                                             | 41     | 12.13  | 174.89(47.7,386.88)                     |              |
| <b>Occupation</b>                                            |        |        |                                         |              |
| Workers                                                      | 203    | 60.06  | 78.7(23.85,222.59)                      | 0.401        |
| Individual business                                          | 37     | 10.95  | 66.78(23.85,164.55)                     |              |
| Others (national civil servant/services /retired staff etc.) | 64     | 18.93  | 123.22(57.63,328.31)                    |              |
| Unemployed                                                   | 34     | 10.06  | 174.89(47.7,386.88)                     |              |
| <b>Number of times visiting health-care facilities</b>       |        |        |                                         |              |
| <=2                                                          | 214    | 63.31  | 34.18(15.9,95.39)                       | <0.0001      |
| 3~6                                                          | 101    | 29.88  | 158.99(81.08,289.36)                    |              |
| >=7                                                          | 23     | 6.80   | 724.52(328.79,724.52)                   |              |

| <b>health-care facilities for the first time</b>          |     |       |                         |
|-----------------------------------------------------------|-----|-------|-------------------------|
| community healthcare center                               | 71  | 21.01 | 100.69(37.36,283)       |
| public facility                                           | 48  | 14.20 | 95.39(63.6,249.61)      |
| general hospital                                          | 136 | 40.24 | 48.02(15.9,174.89)      |
|                                                           |     |       | 0.05                    |
| private clinics                                           | 38  | 11.24 | 57.55(23.85,127.19)     |
| others                                                    | 45  | 13.31 | 87.44(31.8,174.89)      |
| <b>delay between symptom onset and first consultation</b> |     |       |                         |
| <=7                                                       | 152 | 44.97 | 80.29(28.14,271.48)     |
| 7~14                                                      | 38  | 11.24 | 73.93(31.8,174.89)      |
| 14~21                                                     | 42  | 12.43 | 64.39(17.49,119.24)     |
| >=21                                                      | 106 | 31.36 | 79.5(19.71,174.89)      |
|                                                           |     |       | 0.375                   |
| <b>delay of diagnosis</b>                                 |     |       |                         |
| <=7                                                       | 186 | 55.03 | 32.91(15.9,96.67)       |
| 7~14                                                      | 35  | 10.36 | 79.5(37.92,167.73)      |
| >14                                                       | 117 | 34.62 | 166.94(81.08,479.83)    |
|                                                           |     |       | <0.0001                 |
| <b>Whether in the hospital due to TB</b>                  |     |       |                         |
| yes                                                       | 22  | 6.51  | 1203.28(675.71,1564.46) |
| no                                                        | 316 | 93.49 | 71.55(23.85,1669.55)    |
|                                                           |     |       | <0.0001                 |
| <b>The degree of symptoms at diagnosis</b>                |     |       |                         |
| None                                                      | 50  | 14.79 | 76.63(17.49,280.88)     |
| Mild                                                      | 112 | 33.14 | 69.96(23.85,172.9)      |
| Moderate                                                  | 88  | 26.04 | 80.61(31.8,173.94)      |
| Severe                                                    | 88  | 26.04 | 82.2(31.8,302.08)       |
|                                                           |     |       | 0.412                   |
| <b>History of TB</b>                                      |     |       |                         |
| New patients                                              | 315 | 93.20 | 78.7(23.85,190.79)      |
| Re-treated patients                                       | 23  | 6.80  | 100.69(48.49,297.98)    |
|                                                           |     |       | 0.05                    |

367

368

369

370

371

**Table 4** Confounder adjusted association between *pre-diagnosis costs* and various predictor variables using linear regression models in the study of Bao'an district, Shenzhen City, China, 2013 (n=338)

| Predictors in the model                         | Beta coefficient | (95% CI)    | P value | VIF  |
|-------------------------------------------------|------------------|-------------|---------|------|
| Number of times visiting health-care facilities | 0.12             | (0.11,0.14) | < 0.001 | 1.05 |

whether in hospital due to TB (ref: no)

|                                                              |       |              |         |      |
|--------------------------------------------------------------|-------|--------------|---------|------|
| yes                                                          | -1.02 | (-1.2,-0.84) | < 0.001 | 1.03 |
| <b>education (ref:Primary/illiterate)</b>                    |       |              |         |      |
| college or above                                             | 0.26  | (0.12,0.39)  | < 0.001 | 1.03 |
| <b>Occupation(ref:workers)</b>                               |       |              |         |      |
| Others (national civil servant/services /retired staff etc.) | 0.13  | (0.02,0.24)  | 0.02    | 1.03 |
| <b>History of TB (ref: new patients)</b>                     |       |              |         |      |
| Re-treated patients                                          | 0.22  | (0.04,0.40)  | 0.02    | 1.02 |

372  
373

374 **Table 5** Confounder adjusted association between *pre-diagnosis\* costs* and various predictor  
375 variables using logistic regression models in the study of Bao'an district, Shenzhen City, China,  
376 2013 (n=338)

377

| predictor in the model                          | B            | Exp(B)       | (95% CI)      | P value          |
|-------------------------------------------------|--------------|--------------|---------------|------------------|
| Number of times visiting health-care facilities | <b>0.818</b> | <b>2.267</b> | (1.760,2.919) | <b>&lt;0.001</b> |
| <b>History of TB (ref: new patients)</b>        |              |              |               |                  |
| Re-treated patients                             | 1.001        | 2.721        | (1.037,7.140) | 0.042            |
| <b>Education(ref:Primary/illiterate)</b>        |              |              |               |                  |
| Junior high school                              | -1.760       | 0.172        | (0.062,0.475) | 0.001            |
| Senior high school                              | -1.168       | 0.311        | (0.137,0.705) | 0.005            |
| college or above                                | -0.901       | 0.406        | (0.176,0.936) | 0.034            |
| <b>delay of diagnosis</b>                       | -0.014       | 0.986        | (0.971,1.001) | 0.062            |
| <b>constant</b>                                 | -1.920       | 0.147        |               | 0.003            |

378

379 \*Pre-diagnosis costs in generalized linear model (logistic regression) was categorized based on median value  
380 among all participants

381

382 **Table 6** Association of post-diagnosis costs by background characteristics and  
383 care-seeking behaviors among tuberculosis patients enrolled in the study of Bao'an district,  
384 Shenzhen City, China, 2013

| Variables | Number | % | median(IQR range) of pre-diagnosis cost | p |
|-----------|--------|---|-----------------------------------------|---|
|-----------|--------|---|-----------------------------------------|---|

|                                                              |     |        |                         |         |
|--------------------------------------------------------------|-----|--------|-------------------------|---------|
| <b>Gender</b>                                                |     |        |                         |         |
| Female                                                       | 178 | 34.63% | 1128.91(764.9,1717.51)  | 0.309   |
| Male                                                         | 336 | 65.37% | 1128.91(764.9,1717.52)  |         |
| Age                                                          | 514 | 100%   | 1074.38(745.35,1818.69) | 0.177   |
| <b>Household registration</b>                                |     |        |                         |         |
| Native patients                                              | 26  | 5.06%  | 760.93(489.53,1277.49)  | 0.003   |
| Migrant patients                                             | 488 | 94.94% | 1096.24(757.65,1852.85) |         |
| <b>Marital status</b>                                        |     |        |                         |         |
| unmarried                                                    | 180 | 35.02% | 1103.47(743.68,1864.68) | 0.193   |
| married                                                      | 308 | 59.92% | 1018.08(746.43,1719.76) |         |
| widowed/divorced                                             | 10  | 1.95%  | 2208.69(844.63,3183.62) |         |
| others                                                       | 16  | 3.11%  | 879.98(691.18,1803.74)  |         |
| <b>Education</b>                                             |     |        |                         |         |
| Primary/illiterate                                           | 63  | 12.26% | 859.61(662.77,1398.92)  | 0.039   |
| Junior high school                                           | 220 | 42.80% | 1150.77(827.62,1921.22) |         |
| Senior high school                                           | 169 | 32.88% | 1021.42(722.61,1632.99) |         |
| college or above                                             | 62  | 12.06% | 1064.25(682.54,1924.26) |         |
| <b>Occupation</b>                                            |     |        |                         |         |
| Workers                                                      | 203 | 60.06% | 78.7(23.85,222.59)      | 0.772   |
| Individual business                                          | 37  | 10.95% | 66.78(23.85,164.55)     |         |
| Others (national civil servant/services /retired staff etc.) | 64  | 18.93% | 123.22(57.63,328.31)    |         |
| Unemployed                                                   | 34  | 10.06% | 174.89(47.7,386.88)     |         |
| <b>Sputum smear status</b>                                   |     |        |                         |         |
| negative                                                     | 287 | 55.84% | 963.15(699.21,1601.36)  | <0.0001 |
| positive                                                     | 227 | 44.16% | 1222.47(803.39,1982.94) |         |
| <b>Interruption of treatment</b>                             |     |        |                         |         |
| Yes                                                          | 67  | 13.04% | 1084.95(801.68,1412.53) | 0.572   |
| No                                                           | 447 | 86.96% | 1067.95(740,1864.68)    |         |
| <b>Household economic burden</b>                             |     |        |                         |         |
| Heavy                                                        | 149 | 28.99% | 1153.54(787.48,1976.25) | 0.021   |
| Moderate                                                     | 236 | 45.91% | 1096.28(740.46,1888.75) |         |
| No burden                                                    | 129 | 25.10% | 961.76(668.92,1344.58)  |         |
| <b>Adverse drug reaction</b>                                 |     |        |                         |         |



|                                            |     |        |                         |       |
|--------------------------------------------|-----|--------|-------------------------|-------|
| Yes                                        | 268 | 52.14% | 1112.96(743.44,1852.95) | 0.447 |
| No                                         | 246 | 47.86% | 1009.81(745.35,1792.01) |       |
| <b>The degree of symptoms at diagnosis</b> |     |        |                         |       |
| None                                       | 131 | 25.49% | 1009.75(733.98,1810.5)  | 0.737 |
| Mild                                       | 181 | 35.21% | 1014.74(719.11,1654.26) |       |
| Moderate                                   | 103 | 20.04% | 1143.66(770.15,1728.62) |       |
| Severe                                     | 99  | 19.26% | 1140.12(757.65,1971.92) |       |
| <b>History of TB</b>                       |     |        |                         |       |
| New patients                               | 484 | 94.16% | 1043.25(733.95,1817)    | 0.064 |
| Re-treated patients                        | 30  | 5.84%  | 1293.75(956.37,1911.22) |       |

385

386

387

388

**Table 7** Confounder adjusted association between *post-diagnosis costs* and various predictor variables using linear regression models in the study of Bao'an district, Shenzhen City, China, 2013 (n=514)

| Predictors in the model                                   | Beta coefficient | (95% CI)        | P value | VIF   |
|-----------------------------------------------------------|------------------|-----------------|---------|-------|
| <b>Sputum smear status (ref: negative)</b>                |                  |                 |         |       |
| positive                                                  | 0.08             | (0.036,0.128)   | < 0.001 | 1.005 |
| <b>household registration (ref: Native patients)</b>      |                  |                 |         |       |
| Heavy                                                     | 0.15             | (0.043-0.254)   | 0.006   | 1.032 |
| <b>reported-household economic burden (ref:no burden)</b> |                  |                 |         |       |
| Heavy                                                     | -0.06            | (-0.109,-0.003) | 0.040   | 1.038 |
| <b>marital status (ref:unmarried)</b>                     |                  |                 |         |       |
| widowed/divorced                                          | 0.17             | (0.04,0.333)    | 0.044   | 1.03  |

389

390

391

392

393

**Table 8** Confounder adjusted association between *post-diagnosis\* costs* and various predictor variables using logistic regression models in the study of Bao'an district, Shenzhen City, China, 2013 (n=514)

| predictor in the model                      | B      | Exp(B) | (95% CI)      | P value |
|---------------------------------------------|--------|--------|---------------|---------|
| <b>Sputum smear status (ref: negative )</b> |        |        |               |         |
| positive                                    | 0.653  | 1.921  | (1.350,2.735) | <0.001  |
| constant                                    | -0.288 | 0.750  |               | 0.016   |

394

395

396

#### 4. Discussion

397 This study evaluated the economic burden borne by TB patients in Shenzhen City during  
398 their illness. We included 533 eligible patients in the survey, 19 of which were lost to  
399 follow-up. The average age of them was 29.6±10.2years. The male was 14 and female was 5.  
400 One patient was with a severe symptoms appeared hemoptysis. The others were with mild or  
401 moderate symptoms like cough, chest distress and fever etc. the lost to follow-up was about 4  
402 percent, and the general Socio-demographic and clinical characteristics of those 19  
403 participants lost to follow-up were identical with the 514 patients. So, we considered there no  
404 much influence on our conclusion.

405 As one of the most population of Shenzhen district and owing numbers of factories, the  
406 migrant population in Bao'an always exceeds the average level of Shenzhen city. The total  
407 number of registered active tuberculosis cases were 1317, included 76(5.8%) native case and  
408 1241(94.2%) migrant cases in 2013[15]. In our study, 95 percent were migrant cases, and about  
409 80% of patients were factory workers or service staffs who general were in a poor economic  
410 status and poor living environment. Under the DOTS program, the CPC provide tuberculosis  
411 patients with a radiologic imaging studies (X-ray) , sputum smear tests and anti-TB drug  
412 during treatment for free amounting to 102.07USD. We found that the migrant patients faced  
413 much costs during TB treatment. This may be owing to the different mode of payment and  
414 free strategy. The current study confirmed that TB patients are from vulnerable groups, and  
415 that migrant groups working in factories face worse living conditions and lower average  
416 income than the general population.

417 The median household costs found in this study (1218USD) were far higher than those in  
418 Africa, India, and rural China [16-18]. These differences could partly be explained by the  
419 differences in purchasing power among these countries/districts and/or due to the omission of  
420 some cost elements in these studies. The more important reason may be the prospective  
421 follow-up design of this study, which reduced recall bias. We found that, one year prior to the  
422 study, 78.5% percent of patients had annual household incomes between 795 and 15,899USD,  
423 while 13 patients made less than 795USD a year. The direct and opportunity costs  
424 corresponded to 26% (1218/4685) of annual personal income. These costs constituted a  
425 considerable part of their disposable income after payment of fixed costs such as rent,  
426 electricity, and water, along with insurance. Moreover, patients must face these costs for more  
427 than 6 months; over a quarter of patients reported that the economic burden of cure was  
428 heavy. Twenty-three patients reported incurring debts due to illness. Factory workers and the  
429 unemployed had to rely on help from their families. Some authors have concluded that all  
430 costs to TB patients account for a higher percentage of their annual income [16, 19-21]. For  
431 example, a survey in three countries showed that treatment-related costs were equivalent to  
432 approximately one year of individual income [22]. The differences between these studies and  
433 ours may be explained by social background, and a higher income level in our study  
434 population.

435 Direct costs are still substantial, with non-TB drugs and auxiliary examinations as the  
436 most significant cost items [23-25]. Additional drugs, such as those for protecting the  
437 liver/kidney or symptomatic treatment, and examinations must be paid for, and it appears  
438 that this led to the high costs during the treatment period, indicating that there may be  
439 over-prescription and over-service, as reported in other studies [26, 27]. Although income loss  
440 and time loss have not affected every tuberculosis patient interviewed, a considerable number  
441 of patients reported being negatively influenced by the disease and concomitant income and  
442 time loss. About 37% (190/514) of the patients were unemployed or suspended from work  
443 after contracting TB and had no income, while the others remained employed and  
444 experienced income loss due to monthly doctor visits. Only 36% of patients had insurance  
445 through the workplace. Patients reported that only a small fraction of medical costs could be  
446 reimbursed, and if they became unemployed, their insurance could lapse. Fifty-nine percent  
447 of patients had no insurance. Thus, departure from daily money-earning activities had a

448 negative economic impact on patients with TB, resulting in impoverishment and worsening  
449 their living situations [23]. However, the opportunity costs in these cases may be  
450 underestimated, since the value of time loss due to daily drug intake was not calculated, and  
451 some patients reported that they had no clear concept of their reduced income due to absences  
452 from the workplace.

453 Out-of-pocket costs and income loss pre-diagnosis were much lower compared with  
454 those post-diagnosis, accounting for less than 10% of total costs. This is consistent with reports  
455 from other studies [28, 29]. A review of the financial burden of tuberculosis indicated that half  
456 of total costs were incurred before treatment [30]. The possible reason for this may be that  
457 individuals found it difficult to comprehend the concept of calculating the monetary value of  
458 unpaid work, and many of the patients in this study were found as a result of the health  
459 check-ups required by their work units. Those suspected patients were initially referred to the  
460 CSC for diagnosis, and the first X-ray and sputum smear test were free for them. The delay of  
461 diagnosis and number of times visiting health-care facilities were decreased and less costs  
462 incurred. We find that those who accepted higher education and occupied in national civil  
463 servant/services or retired staff may incur more costs before diagnosis. Those patients may  
464 have a good economic condition and care more about self-health conditions.

465 Less than one-fifth of patients initially visited a public health-care facility at the onset of  
466 TB symptoms. This led to long delays in the identification of a treatment-seeking pathway  
467 before a proper diagnosis was confirmed. The reasons for this may be gender, education, and  
468 economic conditions in terms of patients who missed the perfect treatment period, resulting in  
469 an advanced disease [31]. Financial considerations are a major factor contributing to  
470 health-seeking behavior in the Chinese population [32]. Inefficiencies in public health facilities  
471 and control services at private facilities are the two main constraints responsible for prolonged  
472 delay and increased costs of TB diagnosis [33, 34]. In our analysis, we found visiting times as  
473 one of the factors affecting related pre-diagnosis costs, with a mean of 3 visits to different  
474 health-care facilities. Only 35.6% of patients reported that they were diagnosed with suspected  
475 tuberculosis at their first visit, and the rest were informed that they had pneumonia, pleurisy,  
476 a cold, and so on. Consistent with our study, other investigators pointed out that early  
477 diagnosis of tuberculosis reduced costs while achieving treatment success [35, 36]. Given that  
478 TB case detection under the current DOTS strategy in China is through passive case findings,  
479 it is imperative to increase patient and community health education and, further, to strengthen  
480 the consciousness and capacity of grass-roots public facilities to transfer suspected TB patients  
481 to better-equipped hospitals through improved work motivation.

482 Treatment interruption is defined as any interruption of treatment for at least one day but  
483 for < 8 consecutive weeks [37], which has been proven to be a risk factor in treatment failure,  
484 drug resistance, relapse, and death [38, 39]. Economic disadvantage is strongly associated with  
485 non-adherence to TB treatment [40]. Meanwhile, the link between medical costs and  
486 adherence in China has been proven [41]. In our study, we didn't find that this related to high  
487 treatment costs statistically. But we find that above seventy percent of post-diagnosis costs  
488 occurred during consolidation period. This may be an economic factor influencing the  
489 adherence of treatment. Thirteen percent of patients reported that they had interrupted  
490 treatment for more than two months, mainly due to: first, side-effects from drugs, when  
491 patients experienced a heavy adverse reaction such as liver damage, especially at the intensive  
492 period, which always required doctors to stop treating to protect the liver; second, when  
493 patients returned to their home towns, where current strategies prevented them from taking  
494 anti-TB drugs beyond one month, so many chose to stop treatment; and finally, more than 90%  
495 of the patients who discontinued treatment did so during the continuation phase of treatment,  
496 reportedly because, during this phase, most symptoms disappeared and patients erroneously  
497 believed that they were cured, making them reluctant to bear the extra burden of the medical  
498 costs and income loss. High treatment costs may deter patients who have the most income loss

499 from continuing treatment [42]. The patients who stopped treatment usually developed  
500 advanced disease difficult to cure, resulting in a longer period of cure and, in turn, higher  
501 costs. This seems to be a vicious cycle whereby expenditures increase while interruption leads  
502 to more expenditure. Other factors, such as inconvenient daily drug intake and work  
503 obligations, were also taken into consideration by the patients.

504 Although gender was associated with higher costs in some studies [43], we found no  
505 difference in costs between male and female patients, consistent with results from another  
506 study [44]. Re-treated patients and sputum smear positive patients may have higher  
507 expenditures during different treatment episodes due to a longer treatment period and more  
508 complicated conditions.

509 This study may seem to be only partly representative of Shenzhen City, since only one  
510 district was included. However, the study is representative of most tuberculosis patients in  
511 Shenzhen City, because about 50% of all cases under DOTS came from the study site. The  
512 re-treatment rate in our study was 5.84%, which is similar to that reported in other studies,  
513 with a re-treatment rate of 6.7% in Shenzhen [45] and 6.4% in other provinces in China [46].  
514 This indicates that our study was acceptably representative of the treatment conditions for TB  
515 patients in Shenzhen specifically and China generally. As other studies related to the  
516 household costs of tuberculosis, this study also relied on self-reported costs of pre-diagnosis  
517 and household income. Thus, recall and reporting bias could not be avoided. Hence, we  
518 conducted the first interviews of patients after one month of treatment to reduce recall time.  
519 Interviewers were also trained to reduce the bias by logic-checking the information from the  
520 registration system and recognizing unusually high costs for specific items. In addition, asking  
521 patients to calculate the monetary value of unpaid work proved to be difficult, even though  
522 our interviewers explained as much as they could.

523 Our study does have some limitations. First, our study only investigated the economic  
524 burden of patients brought by TB and those with severe co-morbidities such as AIDS, diabetes,  
525 and lung cancer and older than 59 were excluded. Therefore our study may reflect the  
526 economic burden faced by patients result from TB instead of all population and all kinds of  
527 diseases. Second, in our study, we did not survey the information regarding companion costs  
528 although it may not have much impact on the results since most TB patients in China did not  
529 need to be companion during the treatment. Third, we collected the range of the household's  
530 pre-TB annual income of every patient instead the exact number. As a result, we are not able  
531 to conduct the analysis regarding catastrophic cost.

## 532 **5. Conclusions**

533 In conclusion, patients and their households face heavy expenditures due to the costs of  
534 TB care, which accounted for 26% of patients' annual income. Costs were not equally spread  
535 over time, but in the post-diagnosis period, the costs are highest, exacerbating the problem of  
536 affordability. Free TB drugs are not the same as free treatment, and non-TB drugs,  
537 examinations, and loss of income are important considerations for patients. The income loss  
538 among all patients averaged 157USD (IQR 57-855). More visits to health-care facilities  
539 generated more out-of-pocket costs. Patients who had severe symptoms and re-treated  
540 patients bore a heavier burden. For high costs to be avoided, more attention should be paid to  
541 TB patients, even under the DOTS strategy. TB patients require testing methods with higher  
542 sensitivity, higher specificity, and lower costs to reduce their need for visits to health-care  
543 facilities, along with more instructions to improve their adherence to treatment, leading to  
544 lower re-treatment rates.

545

546 **Acknowledgments:** The authors thank the participants who responded to our questionnaires and the TB  
547 doctors who participated in the questionnaire survey. We also express our deep gratitude to the staffs of

548 the Bao'an Chronic Disease Prevention and Cure Hospital and the Center for Tuberculosis Control of  
549 Guangdong Province.

## 550 References

- 551 1. Global tuberculosis report 2018. World Health Organization: Geneva, Switzerland,  
552 2018. Licence: CC BY-NC-SA 3.0 IGO.
- 553 2. China Tuberculosis Control Collaboration. The effect of tuberculosis control in China  
554 [J]. *Lancet* 2004, 364, 417–422.
- 555 3. Yu, X.; Song, H.F.; Feng, Y.J.; Ye, Z.J. Significance of Gene Xpert-MTB/RIF assay in  
556 diagnosis of tuberculosis. *J. Practical Med.* 2019, 35, 985–988.
- 557 4. Liu, Y.; Xu, C.H.; Wang, Z.Y.; et al. [A cross-sectional study on economic burden of  
558 pulmonary tuberculosis cases from designated tuberculosis hospital]. *Zhonghua Liu Xing  
559 Bing Xue Za Zhi.* 2019, 40, 559–564 [article in Chinese].
- 560 5. Chen, S.; Zhang, H.; Pan, Y.; et. al. Are free anti-tuberculosis drugs enough? An  
561 empirical study from three cities in China [J]. *Infectious Diseases of Poverty.* 2015, 4, 47.
- 562 6. Stracker, N.; Hanrahan, C.; Mmolawa, L.; et al. Risk factors for catastrophic costs  
563 associated with tuberculosis in rural South Africa. *Int. J. Tuberc. Lung Dis.* 2019, 23, 756–763.
- 564 7. Li, Y.; Ehiri, J.; Tang, S.; et al. Factors associated with patient, and diagnostic delays in  
565 Chinese TB patients: a systematic review and meta-analysis. *BMC Med.* 2013, 11, 156.
- 566 8. Qiu, S.; Pan, H.; Zhang, S.; et al. Is tuberculosis treatment really free in China? A study  
567 comparing two areas with different management models. *PLoS One.* 2015, 10, e0126770.
- 568 9. Lönnroth, K.; Raviglione, M. The WHO's new End TB Strategy in the post-2015 era of  
569 the Sustainable Development Goals. *Trans. R. Soc. Trop. Med. Hyg.* 2016, 110, 148–150.
- 570 10. Guan, H.Y.; Yang, Y.Z.; Tan, W.G.; et al. Effect evaluation of Shenzhen tuberculosis  
571 control and prevention program implementation from 2001 to 2010 [J]. *Chin. J.  
572 Anti-tuberculosis.* 2013, 9, 729–737.
- 573 11. Liu, J.H.; Zhang, L.; Lu, T.W.; et al. TB control strategy of the preliminary analysis in  
574 Bao'an District [J]. *Prog. Mod. Biomed.* 2010, 21, 4116–4117.
- 575 12. de Cuevas, R.M.; Lawson, L.; Al-Sonboli, N.; et al. Patients direct costs to undergo TB  
576 diagnosis. *Infect. Dis Poverty.* 2016, 5, 24.
- 577 13. P. Vatcheva, K. and M. Lee, Multicollinearity in Regression Analyses Conducted  
578 in Epidemiologic Studies. *Epidemiology: Open Access*, 2016. 06(02)
- 579 14. Feng, C., et al., Log-transformation and its implications for data analysis. *Shanghai  
580 Arch Psychiatry*, 2014. 26(2): p. 105-9.
- 581 15. ZHANG Juanjuan, HU Fangxiang, WANG Yunxia, et al. Epidemiological  
582 characteristics of tuberculosis in Bao'an District, Shenzhen, 2008-2015. *China Tropical  
583 Medicine*, February 2018, Vol.18, No.2:p128-130
- 584 16. Ukwaja, K.N.; Modebe, O.; Igwenyi, C.; et al. The economic burden of tuberculosis  
585 care for patients and households in Africa: a systematic review [J]. *Int. J. Tuberc. Lung Dis.*  
586 2012, 16, 733–739.
- 587 17. Suen, S.C.; Bendavid, E.; Goldhaber-Fiebert, J.D. Cost-effectiveness of improvements  
588 in diagnosis and treatment accessibility for tuberculosis control in India. *Int. J. Tuberc. Lung  
589 Dis.* 2015, 19, 1115–1124.
- 590 18. Pan, H.Q.; Bele, S.; Feng, Y.; et al. Analysis of the economic burden of diagnosis and  
591 treatment of tuberculosis patients in rural China [J]. *Int. J. Tuberc. Lung Dis.* 2013, 17,  
592 1575–1580.
- 593 19. Gospodarevskaya, E.; Tulloch, O.; Bunga, C.; et al. Patient costs during tuberculosis  
594 treatment in Bangladesh and Tanzania: the potential of shorter regimens [J]. *Int. J. Tuberc.  
595 Lung Dis.* 2014, 18, 810–817.

596 20. Hu, D.; Long, Q.; Chen, J.; Wang, X.; Huang, F.; Ji, J.S. Factors influencing  
597 hospitalization rates and inpatient cost of patients with tuberculosis in Jiangsu Province,  
598 China: an uncontrolled before and after study. *Int. J. Environ. Res. Public Health*. 2019, 16.  
599 21 Onazi, O.; Gidado, M.; Onazi, M.; et al. Estimating the cost of TB and its social impact  
600 on TB patients and their households. *Public Health Action*. 2015, 5, 127–131.  
601 22. Mauch, V.; Bonsu, F.; Gyapong, M.; et al. Free tuberculosis diagnosis and treatment  
602 are not enough: patient cost evidence from three continents [J]. *Int. J. Tuberc. Lung Dis*. 2013,  
603 17, 381–387.  
604 23. Tanvejsilp, P.; Loeb, M.; Dushoff, J.; Xie, F. Healthcare resource uses and out-of-pocket  
605 expenses associated with pulmonary TB treatment in Thailand. *Pharmacoecon. Open*. 2018, 2,  
606 297–308.  
607 24. Pedrazzoli, D.; Siroka, A.; Boccia, D.; et al. How affordable is TB care? Findings from a  
608 nationwide TB patient cost survey in Ghana. *Trop. Med. Int. Health*. 2018, 23, 870–878.  
609 25. Asres, A.; Jerene, D.; Deressa, W. Pre- and post-diagnosis costs of tuberculosis to  
610 patients on Directly Observed Treatment Short course in districts of southwestern Ethiopia: a  
611 longitudinal study. *J. Health Popul. Nutr*. 2018, 37, 15.  
612 26. Tang, S.; Wang, L.; Wang, H.; Chin, D.P. Access to and affordability of healthcare for  
613 TB patients in China: issues and challenges. *Infect. Dis. Poverty*. 2016, 5, 10.  
614 27. Jia, X.; Chen, J.; Zhang, S.; Dai, B.; Long, Q.; Tang, S. Implementing a "free"  
615 tuberculosis (TB) care policy under the integrated model in Jiangsu, China: practices and costs  
616 in the real world. *Infect. Dis. Poverty*. 2016, 5, 2.  
617 28. Fuady, A.; Houweling, T.A.J.; Mansyur, M.; Burhan, E.; Richardus, J.H. Effect of  
618 financial support on reducing the incidence of catastrophic costs among tuberculosis-affected  
619 households in Indonesia: eight simulated scenarios. *Infect. Dis. Poverty*. 2019, 8, 10.  
620 29. Mullerpattan, J.B.; Udawadia, Z.Z.; Banka, R.A.; Ganatra, S.R.; Udawadia, Z.F.  
621 Catastrophic costs of treating drug resistant TB patients in a tertiary care hospital in India.  
622 *Indian J. Tuberc*. 2019, 66, 87–91.  
623 30. Tanimura, T.; Jaramillo, E.; Weil, D.; Raviglione, M.; Lönnroth, K. Financial burden for  
624 tuberculosis patients in low- and middle-income countries: a systematic review. *Eur. Respir. J*.  
625 2014, 43, 1763–1775.  
626 31. Gebreegziabher, S.B.; Bjune, G.A.; Yimer, S.A. Patients' and health system's delays in  
627 the diagnosis and treatment of new pulmonary tuberculosis patients in West Gojjam Zone,  
628 Northwest Ethiopia: a cross-sectional study. *BMC Infect. Dis*. 2016, 16, 673.  
629  
630 32. Li, Y.; Ehiri, J.; Tang, S.; et al. Factors associated with patient, and diagnostic delays in  
631 Chinese TB patients: a systematic review and meta-analysis [J]. *BMC Med*. 2013, 11, 156.  
632 33. Bogale, S.; Diro, E.; Shiferaw, A.M.; Yenit, M.K. Factors associated with the length of  
633 delay with tuberculosis diagnosis and treatment among adult tuberculosis patients attending  
634 at public health facilities in Gondar town, Northwest, Ethiopia. *BMC Infect. Dis*. 2017, 17, 145.  
635 34. Osei, E.; Akweongo, P.; Binka, F. Factors associated with DELAY in diagnosis among  
636 tuberculosis patients in Hohoe Municipality, Ghana. *BMC Public Health*. 2015, 15, 721.  
637 35. Pichenda, K.; Nakamura, K.; Morita, A.; et al. Non-hospital DOT and early diagnosis  
638 of tuberculosis reduce costs while achieving treatment success [J]. *Int. J. Tuberc. Lung Dis*.  
639 2012, 16, 828–834.  
640 36. Duan, W.; Zhang, W.; Wu, C.; et al. Extent and determinants of catastrophic health  
641 expenditure for tuberculosis care in Chongqing municipality, China: a cross-sectional study.  
642 *BMJ Open*. 2019, 9, e026638.  
643 37. Jakubowiak, W.; Bogorodskaya, E.; Borisov, S.; et al. Treatment interruptions and  
644 duration associated with default among new patients with tuberculosis in six regions of  
645 Russia [J]. *Int. J. Infect. Dis*. 2009, 13, 362–368.

- 646 38. Mekonnen, H.S.; Azagew, A.W. Non-adherence to anti-tuberculosis treatment,  
647 reasons and associated factors among TB patients attending at Gondar town health centers,  
648 Northwest Ethiopia. *BMC Res. Notes.* 2018, 11, 691.
- 649 39. de Faria Gomes, N.M.; da Mota Bastos, M.C.; Marins, R.M.; et al. Differences between  
650 risk factors associated with tuberculosis treatment abandonment and mortality. *Pulm. Med.*  
651 2015, 2015, 546106. doi:10.1155/2015/546106.
- 652 40. Wanyonyi, A.W.; Wanjala, P.M.; Githuku, J.; Oyugi, E.; Kutima, H. Factors associated  
653 with interruption of tuberculosis treatment among patients in Nandi County, Kenya 2015. *Pan*  
654 *Afr. Med. J.* 2017, 28(Suppl 1), 11.
- 655 41. Long, Q.; Smith, H.; Zhang, T.; et al. Patient medical costs for tuberculosis treatment  
656 and impact on adherence in China: a systematic review [J]. *BMC Public Health.* 2011, 11, 393.
- 657 42. Gorityala, S.B.; Mateti, U.V.; Konuru, V.; Martha, S. Assessment of treatment  
658 interruption among pulmonary tuberculosis patients: a cross-sectional study. *J. Pharm.*  
659 *Bioallied Sci.* 2015, 7, 226–229.
- 660 43. Ukwaja, K.N.; Alobu, I.; Abimbola, S.; et al. Household catastrophic payments for  
661 tuberculosis care in Nigeria: incidence, determinants, and policy implications for universal  
662 health coverage [J]. *Infect. Dis. Poverty.* 2013, 2, 21.
- 663 44. Zhou, C.; Long, Q.; Chen, J.; et al. Factors that determine catastrophic expenditure for  
664 tuberculosis care: a patient survey in China. *Infect. Dis. Poverty.* 2016, 5, 6.
- 665 45. Bao, H.; Liu, K.; Wu, Z.; et al. Tuberculosis among full-time teachers in Southeast  
666 China, 2005–2016. *Int. J. Environ. Res. Public Health.* 2018, 15, 2024. Published 2018 Sep 17.  
667 doi:10.3390/ijerph15092024.
- 668 46. Zhu, L.; Yang, Y.Z.; Guan, H.Y.; et al. Trends in drug-resistant tuberculosis after the  
669 implementation of the DOTS strategy in Shenzhen, China, 2000–2013. *Int. J. Tuberc. Lung Dis.*  
670 2017, 21, 759–765. doi:10.5588/ijtld.16.0759.





Click here to access/download  
**Supporting Information**  
data.xls



1 **Analysis of the Economic Burden of Diagnosis**  
2 **and Treatment on Patients with non-drug**  
3 **resistance Tuberculosis (TB) in the TB Control**  
4 **Demonstration Area of China**

5 **Yixiang Huang<sup>1,#</sup>, Jianying Huang<sup>2,#</sup>, Xiaoting Su<sup>1</sup>, Liang Chen<sup>3</sup>, Jianwei Guo<sup>1</sup>, Weiqing**  
6 **Chen<sup>4,\*</sup> and Lingling Zhang<sup>5</sup>**

7 <sup>1</sup> Department of Health Policy and Management, School of Public Health, Sun Yat-sen University,  
8 Guangzhou, 510080, China

9 <sup>2</sup> Guangdong Women and Children Hospital, Guangzhou, 511442, China

10 <sup>3</sup> Centre for Tuberculosis Control of Guangdong Province, Guangzhou, 510630, China

11 <sup>4</sup> Department of Medical Statistics and Epidemiology, School of Public Health, Sun Yat-sen University,  
12 Guangzhou, 510080, China

13 <sup>5</sup> Department of Nursing, College of Nursing and Health Sciences, University of Massachusetts, Boston  
14 02125-3393, USA

15 <sup>\*</sup>Correspondence: chenwq@mail.sysu.edu.cn

16 <sup>#</sup> Yixiang Huang and Jianying Huang contributed equally to this work.

17  
18  
19  
20  
21  
22  
23  
24  
25  
26  
27  
28  
29  
30  
31  
32  
33  
34  
35  
36  
37  
38  
39  
40  
41

42

43 **Abstract:** Background: Illness-related ~~costs expenditures~~ experienced by patients produce a  
44 severe economic impact on households, especially those of poor families. Few studies have  
45 investigated the full costs, including direct and opportunity costs, at the patient and  
46 household levels in the south-east of China. Methods: ~~A case follow-up study was conducted~~  
47 ~~in the Bao'an district— of Shenzhen City, China.~~ Eligible new and re-treated individuals with  
48 pulmonary TB ~~in the Bao'an district~~ during ~~1 January 1<sup>st</sup> 2013 to 30<sup>th</sup> June 2013~~ ~~the study period~~  
49 were enrolled. Medical and non-medical costs as well as income loss were calculated in  
50 pre-diagnosis and post-diagnosis periods, respectively. Factors ~~affecting—associated~~  
51 ~~pre-diagnosis high~~ costs ~~and post-diagnosis costs~~ were explored ~~respectively~~ with a ~~linear~~  
52 ~~regression model~~ ~~multiple regression model~~. Results: Of the total 514 TB patients enrolled,  
53 most were from the migrant population, and 65% were males (336), with a mean age of 32.25  
54 ( $\pm 10.11$ ) years. The median pre-diagnosis direct costs, direct post-diagnosis costs, and  
55 post-diagnosis medical and non-medical costs were 79USD, 748USD, 542USD, and 150USD  
56 (6.2897CNY = 1USD, 2013) per patient, respectively. The median total cost of TB treatment  
57 per patient was 1218USD, corresponding to 26% of patients' annual income pre-illness.  
58 ~~Factors—Variables~~ associated with ~~out-of-pocket—pre-diagnosis~~ costs included number of  
59 times visiting health facilities, ~~whether in hospital due to TB~~, ~~education~~, ~~History of TB~~.  
60 ~~Variables associated with post-diagnosis costs~~ ~~was/were~~ household registration, ~~sputum~~  
61 ~~smear status~~, ~~reported~~ ~~reported~~ ~~household economic burden~~, ~~marital~~ ~~marital status~~ ~~history of~~  
62 ~~TB~~, ~~and the degree of symptoms at diagnosis~~. Conclusions: Although a free TB control  
63 policy is in force, patients with TB are still facing a heavy economic burden. More available  
64 interventions to reduce the financial burden on tuberculosis patients are urgently needed.

65 **Keywords:** Tuberculosis; cost of illness; economic burden; China

66

## 67 1. Introduction

68 Tuberculosis (TB) is one of the top 10 causes of death worldwide as well as being the  
69 leading cause from a single infectious agent (more than HIV/AIDS). According to 2018 global  
70 estimates, there were almost 10 million new cases of TB and 1.3 million TB deaths in 2017 [1].  
71 The high prevalence of TB is always a critical public health problem in China, accounting for  
72 the second highest number of cases in the world except in India, with 778,000 identified cases  
73 of TB in 2017 [1]. Since 1990, the WHO-recommended directly observed treatment + short  
74 course chemotherapy (DOTS) strategy to control this epidemic has been implemented by the  
75 Chinese government under the National Tuberculosis Control Program [2], whose guidelines  
76 include free anti-TB drugs for 6 months to new patients with TB and for 8 months to  
77 re-treatment patients in addition to ~~—multi-drug resistant/ extensively-drug resistant~~  
78 (MDR/EXDR) patients. Tests include one free X-ray test for individuals suspected of having  
79 TB at their first visit, one free sputum smear test for those whose X-ray tests are abnormal, and  
80 free sputum smear tests for patients undergoing free anti-TB treatment. With the development  
81 of molecular biology, a new testing method called GeneXpert/RIF (abbreviated as Xpert) is  
82 recommended. With a shorter time of testing, higher sensitivity, and higher specificity, Xpert  
83 has been rapidly adopted for clinical diagnoses in China [3].

84 However, many investigators have pointed out that both the TB patients and their  
85 households bear a heavy economic burden. Even the free DOTS control strategy is far from  
86 sufficient [4, 5]. Tuberculosis is a well-known poverty-related disease, an association that has  
87 been well-established at both patient and household levels, usually related to the  
88 disadvantages of socio-economic status. In particular, among those who come from rural and

89 poor districts, the scarcity of health resources and their poor economic condition place them in  
90 a more serious situation [6]. The financial aspect is a major factor contributing to  
91 health-care-seeking behavior among Chinese patients. Delayed and repeated visits to clinics  
92 before diagnosis, the over-prescribing of drugs, and prolonged treatment are common [7].  
93 Patients must bear ~~heavy-too much out-of-pocket expenditures~~economic burden, such as, for  
94 example, medical and transportation costs, and income loss, precluding them from further  
95 adhering to treatment and resulting in treatment failure [5].

96 There have been many studies on the cost-effectiveness of different TB control strategies,  
97 mainly investigating the costs to the health system in the Eastern, Middle, and Western  
98 Regions of China. These studies focused mainly on the effectiveness of medical insurance for  
99 coping with the costs of illness as well as patient compliance with drug regimens [5, 8].  
100 However, far fewer studies have measured the costs to patients and households or the full  
101 costs, including direct and opportunity costs, from the onset of symptoms to the end of  
102 treatment in the south-east of China. To achieve the health-related Sustainable Development  
103 Goal (SDG) proposed by the United Nations and the goal of ending the TB epidemic by 2035  
104 proposed by WHO, whose last target reads “No TB patients and their families face  
105 Catastrophic costs (>20% of annual household income)” [9], all TB patients should receive  
106 accessible and affordable standard medical treatment. Therefore, the present study was  
107 performed to evaluate the out-of-pocket direct costs as well as productivity lost related to  
108 illness. Potential factors associated with these costs were also explored. We aimed to establish  
109 the evidence base for interventions that can contribute to TB-related cost reduction, increase  
110 patient adherence to treatment, and treatment success rates. There is a need to document the  
111 full economic burden of TB care borne by patients and their households.

## 112 2. Materials and Methods

### 113 2.1. Study Setting

114 Shenzhen City is one of the most prosperous regions in China, with a Gross Domestic  
115 Product (GDP) of nearly 225-269 million CNY in 2017-2019. Its estimated population is over 12-13  
116 million, with the migrant population constituting 65.3% while this rate is 82.4% in Bao'an  
117 district of the total regional population according to the Shenzhen statistical yearbook 2019.  
118 (<http://tjj.sz.gov.cn/>). The mean household income in the region was 6,656.79 USD of 2012  
119 according to the Statistical yearbook 2013. The rapid economic growth in the city, leading to  
120 higher income levels, attracts numerous young migrant workers, mostly from remote poor areas  
121 exposed to substandard conditions such as lower societal status, poor standard of living, limited  
122 health knowledge, and less accessibility to health services, thus creating favorable conditions for  
123 infection with *Mycobacterium tuberculosis* and progression to disease. Such conditions delay  
124 individuals from seeking health care, resulting in advanced disease and continued transmission  
125 of TB in the community. Although analysis of recent data has shown a decreasing incidence of  
126 TB in the Shenzhen region, its prevalence in the Bao'an district, where a heavy concentration of  
127 migrant workers contributes to a high TB case load, is still high.

128 The Bao'an district implemented the 10-year World Bank TB project in 1992, brought the  
129 migrant population into the National TB control program (NTP), and adapted the DOTS  
130 strategies. After this ended in 2002, the Shenzhen TB control project in Guangdong province was  
131 launched. Then, as a representative of Guangdong province, the Bao'an district was selected as  
132 one of the seven counties to implement the fifth round of the globally funded TB control project.  
133 Up to 2010, the Bao'an district was selected by the China Ministry of Health as the site of a  
134 demonstration area for a tuberculosis control model. ~~Since then, the average diagnosis and cure~~  
135 ~~rates have greatly improved. The ~~hosptial~~hospitals were the main palce finding tuberculosis~~  
136 ~~case and the Center for Prevention and Cure of chronic diseases (CPC) were the local designated~~  
137 ~~TB facilities in the national TB program~~ me networks, providing treatment and managing the  
138 tuberculosis cases. The healthcare providers in general hospitals were obligate to refer the

139 [suspected cases to CPC and the basic information of suspected cases were sent to CPC. If the](#)  
140 [cases did not consulted to CPC in time, the workers of CPC would contact the suspected case.](#)  
141 [Actively cooperating with medical institutions and TB prevention and control institutions, the](#)  
142 [discovery rate and report quality was increasing by years. In 2010, the prevalence rate of smear](#)  
143 [positive of native population was 19.44 per 100 000 population, and that of the migrant](#)  
144 [population was 59.96 per 100 000 population and](#) the cure rates for both native and migrant  
145 patients were 94.79% and 82.91%, respectively [10]. The main health-care sources in China are  
146 district public health facilities organized into three tiers of referral: primary (Center for  
147 Prevention and Cure of chronic diseases), secondary (sub-district prevention and care  
148 dispensaries), and tertiary (Community health-care stations) [11]. The DOTS program [means](#)  
149 [directly observed treatment +short course chemotherapy for non-inpatient tuberculosis patients,](#)  
150 [and](#) is available only in public health facilities, where patients have free access to diagnostic and  
151 treatment services. The Center for Prevention and Cure of chronic diseases (CPC) is the  
152 institution authorized to provide TB diagnosis, treatment, and monitoring. The CPC provides  
153 patients with ~~laboratory services like sputum smear tests and an~~ radiologic imaging studies  
154 (X-ray) ~~while diagnosed, and sputum smear tests during treatment, after diagnosis, as well as~~  
155 ~~regular re-examinations~~ and anti-TB drugs for 6-8 months for free. [Patients must regularly](#)  
156 [return to CPC every month after starting to take anti-TB drug until the treatment is over.](#)  
157 [Generally, the number of times of subsequent consultations are 5 and 7 to newly-patients and](#)  
158 [re-treated patients respectively. The costs of every month including auxiliary examinations and](#)  
159 [subsidiary drugs like hepatinica, gastric medicine, and immunopotentiator etc are not](#)  
160 [free. Other costs, however, including auxiliary examinations and subsidiary drugs like](#)  
161 [hepatinica, gastric medicine, and immunopotentiator etc, are not free.](#) The sub-district  
162 prevention and care dispensaries and Community health-care stations coordinating with the  
163 CPC are obligated to perform routine monitoring, referral, and supervision. Adherence is  
164 directly monitored by the health workers of Community health-care stations for daily drug  
165 intake, adverse reactions, and other activities of admitted patients. If patients fail to take a  
166 specific drug for 2 days, the workers will contact them by telephone to ensure that the patients  
167 complete their treatment.

## 168 2.2. Study Design [and population](#)

169 A case follow-up study was conducted in the Bao'an district with an ongoing NTP-DOTS  
170 project. Newly diagnosed and re-treated TB patients aged 15-59 years old, who registered in the  
171 CPC ~~during from~~ 1 January 2013 to June 2013, were included and were followed up until the  
172 completion of a 6- to 8-month treatment course. Those with severe [co-morbidities complications](#)  
173 such as AIDS, diabetes, and lung cancer and those who refused to accept investigation were  
174 excluded. [The patients aged above 59 were excluded considering the elderly may have more](#)  
175 [comorditiescommodities and those with MDR-TB were excluded too.](#) Transferred patients were  
176 also excluded from the study, since information on previous ~~out of pocket expenditures costs~~  
177 was not available. ~~Consecutive consenting eligible patients were interviewed until the required~~  
178 ~~sample size was reached. The operational definition of various costs and indicators were~~  
179 [summarized in table 1.](#)

## 180 2.3. Data Collection

181 All eligible cases were subjected to five (new patients) or seven (re-treatment patients)  
182 interviews at the Department of Tuberculosis Prevention and Control in Bao'an CPC. A  
183 structured questionnaire was used, covering general demographic and socio-economic  
184 characteristics, disease history, care-seeking process, treatment behaviors, and ~~out of pocket~~  
185 ~~expenditures costs both of~~ pre- and post-diagnosis. Self-reported economic status information  
186 was collected based on different localities with various levels of development. The first  
187 interview was at the [first month of](#) intensive phase of treatment, when patients' retrospective  
188  
189

care-seeking history and related expenditures, including pre-diagnosis, starting from the time point when the patients experienced the first symptoms, and the intensive phase related costs, were collected. The other four or six interviews occurred monthly when patients came for regular re-examinations. The patients' TB care experiences and transportation fee, supplementary food cost, and foregone income of patients and companions expenditures after the intensive phase were collected in follow-ups.

A graduate student with two locally recruited research assistants, health workers who had participated in a standardized training session, conducted those interviews. A logic check of all data collected was undertaken to determine if there were any contradictions or missing information. Those ~~contradictions~~ contradictions or missing information questions would be asked of patients again in a subsequent interview. We also evaluated the quality of collected data by verifying the routine health information system.

#### 2.4. Measurements and Definitions

~~We analyzed~~ We analyzed the economic burden from tuberculosis patients' perspective. The primary outcome variables were the mean (median) expense incurred during illness. ~~The primary outcome variables were the mean (median) number of patients and household costs incurred.~~ Information on costs was ascertained for different periods, summarized as pre- and post-diagnosis.

Direct costs included all ~~out-of-pocket expenditures~~ costs of patients and companions attributable to their illness [12], which consisted of the medical costs related to TB diagnosis and treatment (clinical and hospitalization expenses), and non-medical costs incurred by patients or ~~households~~ companions, such as transportation to health facilities and supplementary food. Opportunity costs referred to the income lost by patients and their ~~households~~ companions associated with time lost ~~from~~ off work. Assuming 30 working days per month, we evaluated the value in terms of money for each day, and opportunity costs was calculated as the value per day multiplied by the length of time ~~patients were out of~~ of work due to illness. The income lost before diagnosis was calculated based on each patient's monthly wage prior to the onset of TB. The lost income after diagnosis was calculated based on the monthly wage if patients were still on working during illness. ~~To quantify income lost~~ After diagnosis, patients were asked about the actual ~~reduction of income~~ lost income that they and their companions had experienced due to absence from their usual income-generating activities at every interview. These monthly income reductions were then summed. ~~The income lost by companions pre-diagnosis was not included in the analysis, since only a few such losses occurred. The time spent on daily drug intake was also not calculated, because most patients took drugs on their way to work or at the community health-care stations close to their homes.~~

The economic burden was then analyzed as a proportion of patients' total annual income. The free services provided during diagnosis and treatments were not included in the medical costs. Information about costs after diagnosis was extracted from the information system of the study facility. Information on costs covered by insurance could not be obtained, since the insurance had not been settled at the end of the interview.

Table 1. Operational definition of study participants and TB treatment cost in the study of Bao'an district, Shenzhen City, China, 2013

| Terminology                   | Definition                                                                                                                      |
|-------------------------------|---------------------------------------------------------------------------------------------------------------------------------|
| Study participants            | All newly diagnosed and re-treated TB patients accepted treatment in CPC during 1 January 2013 to June 2013                     |
| Study participants ineligible | Patients with severe co-morbidities such as AIDS, diabetes and lung cancer with multidrug-resistant TB, aged >59 were excluded. |
| Pre-diagnosis costs           | Costs between symptom onset and diagnosed as TB                                                                                 |
| Post-diagnosis costs          | Costs from treatment initiation up to treatment completion                                                                      |



|                                     |                                                                                                                                                                                                                                                                                                                       |
|-------------------------------------|-----------------------------------------------------------------------------------------------------------------------------------------------------------------------------------------------------------------------------------------------------------------------------------------------------------------------|
| Direct medical costs                | Expenses of medical examinations and medicines linked to TB diagnosis and treatment                                                                                                                                                                                                                                   |
| Direct non-medical costs            | Costs for transport, food expenditures ,nutrition supplements due to TB                                                                                                                                                                                                                                               |
| Direct cost                         | Direct medical costs + direct non-medical costs                                                                                                                                                                                                                                                                       |
| Opportunity costs                   | Patients and companions' lost income due to TB-related time off work during the TP episode. The pre-diagnosis opportunity cost was estimated using the time off work multiplied by the reported individual income prior to the onset of TB                                                                            |
| Total costs                         | Direct costs + opportunity costs                                                                                                                                                                                                                                                                                      |
| Sputum smear test                   | At the time of diagnosing conducted one sputum smear test, the outcome included negative and positive.                                                                                                                                                                                                                |
| Household economic burden           | Self-reported economic burden due to TB treatment                                                                                                                                                                                                                                                                     |
| The degree of symptoms at diagnosis | The patients self-reported with different symptoms at diagnosis were divided into four categories. 1. None: no symptoms; 2.mild: with symptoms included cough, -expectoration and dyspnea, night sweat, and debilitation; 3. Moderate: symptoms with fever and- chest distress; 4. severe: symptoms like- hemoptysis. |
| Interruption of treatment           | Treatment interruption is defined as any interruption of treatment for at least one day but for < 8 consecutive weeks                                                                                                                                                                                                 |

233

234

### 235 2.5. Data Analysis

236 The data were double-entered with EpiData 3.1 software (EpiData Association, Odense,  
237 Denmark) for each patient, and cost summaries and analyses were performed by SPSS 20.0  
238 software. Continuous variables like direct costs, opportunity costs were summarized as means  
239 ( $\pm$  standard deviation [SD]) or medians (IQR), while categorical variables were summarized as  
240 proportions. Group comparisons were made with the rank correlation test for means/median, the  
241 Mann-Whitney test or Kruskal-Wallis test for medians in two or multiple groups, and 2 tests  
242 for proportions if their distribution were non-normal.

243 We also did a confounder adjusted analysis for the association between pre-diagnosis costs  
244 or post-diagnosis costs and predictor variables respectively using linear regression. The costs  
245 were log transformed as they were not normally distributed. To explore more variables as  
246 predictor variables, the possible variables were all considered in the linear regression model  
247 irrespective the value in univariate group comparisons. A forward stepwise approach was used  
248 to find the appropriate model. Association was summarized using Beta coefficient (95% CI),  
249 P-value less than 0.05 were significant. Considering the multicollinearity in predictor variables,  
250 we calculated variance inflation factor (VIF) at the same time [13]. If VIF was less than 10, then  
251 the predictor variables were included in the linear model.

252 Considering in applying and interpreting the results of hypothesis testing in a  
253 log-transformed data on actual data (non-log transformed) [14]. Hence, we also conducted a  
254 confounder-adjusted association between costs and predictor variables using generalized linear  
255 model (logistic regression, the costs were divided as binomial variables based on median value.  
256 To explore more variables as predictor variables, the possible variables were all considered in  
257 the linear regression model irrespective the value in univariate group comparisons. Association  
258 was summarized using  $\exp(\beta)$  coefficient (95% CI), P-value less than 0.05 were significant.

Since the costs did not follow a normal distribution, we converted them to a logarithm, and then used a multiple regression analysis to determine factors associated with the economic burden due to TB illness. First, bivariate analyses were done with the Chi square test or Mann-Whitney analysis to examine the effect of each predictor variable on economic burden. Then, the multivariable model was constructed, including all variables with bivariate  $p < 0.1$ . A forward stepwise approach was used to find the appropriate model.  $P$  values less than 0.05 were significant. All of this was performed with SPSS 20.0 software.

## 2.6. Ethics Approval

This study was approved by the research and ethics committee of the School of Public Health, Sun Yat-Sen University, China. Also, permission was obtained from the study site. A signed informed consent was obtained from all patients before being interviewed.

## 3. Results

### 3.1. Socio-demographic Characteristics and Care-seeking Behaviors

The present study surveyed 533 eligible pulmonary tuberculosis patients who with no co-morbidity, 19 of whom were lost to follow-up, one of whom died from another disease, and 18 of whom moved to other provinces. The rate of loss to follow-up was nearly 4%. Among the 514 patients receiving anti-TB treatment, 30 were re-treatment patients, and 95% were members of the migrant population from all over the country. The average age was 32.25 ± 10.11 years, 65% (336/514) of the patients were male, and 35% were female. The mean monthly income of patients before illness was 448USD, about 71.4% of patients had monthly household income between 317.98 to 635.96 USD, and the range of annual household income was between 795 and 15,899USD. About 71.4% of patients had monthly household income between 2000 to 4000.

One hundred seventy-six patients were identified when they accepted health check-ups required by their work units, and were then immediately transferred to the CPC<sub>7</sub>. They were diagnosed at CPC immediately without consulting consulting to other facilities, so their pre-diagnosis costs were not calculated. so no transportation fee or time loss occurred before diagnosis. Three hundred thirty-eight patients were registered as a result of clinical consultation. Among the 338 patients, the median delay time of visiting doctors, defined as the period between onset of symptoms and first contact with a health-care provider, was 11 days (IQR 3-30), for reasons such as having no time, being unaware of the presence of tuberculosis, and lacking money. The median number of consultations prior to diagnosis was 3 (1, 20). The number of first visit in community healthcare center and general hospital was 71(21%) and 136(40.2) respectively. Only 48.14% (48.14%) of patients initially visited a public facility, while the others reported that they first consulted either a drug shop or private hospital/clinic or did nothing. Then median delay time of diagnosis was about 7 (0,200) days.

| Variable           | Number (%)   |
|--------------------|--------------|
| <b>Age (years)</b> |              |
| <20                | 20 (3.89%)   |
| 20~30              | 238 (46.3%)  |
| 30~40              | 143 (27.82%) |
| 40~50              | 70 (13.62%)  |
| >50                | 43 (8.37%)   |
| <b>Gender</b>      |              |
| Male               | 336 (65.40%) |



|                                                 |              |
|-------------------------------------------------|--------------|
| Female                                          | 178 (34.60%) |
| <b>Type of TB</b>                               |              |
| Newly diagnosed patients                        | 484 (94.16%) |
| Re-treatment patients                           | 30 (5.84%)   |
| <b>Marital status</b>                           |              |
| Single                                          | 180 (35.02%) |
| Married                                         | 308 (59.92%) |
| Other (divorced, cohabiting)                    | 26 (5.06%)   |
| <b>Education</b>                                |              |
| Illiterate or primary school                    | 63 (12.26%)  |
| Junior high school                              | 220 (42.80%) |
| Senior high school                              | 169 (32.88%) |
| Junior college and above                        | 62 (12.06%)  |
| <b>Occupation</b>                               |              |
| Factory worker                                  | 316 (61.48%) |
| Individual business                             | 46 (8.95%)   |
| Other (include company staff/service personnel) | 99 (19.26%)  |
| Unemployed                                      | 53 (10.31%)  |
| <b>Residence</b>                                |              |
| Native                                          | 26 (5.06%)   |
| Migrant                                         | 488 (94.94%) |
| <b>Self-reported economic status*</b>           |              |
| High                                            | 30 (5.84%)   |
| Medium                                          | 323 (62.84%) |
| Low                                             | 161 (31.32%) |
| <b>First visited a public facility</b>          |              |
| Yes                                             | 48 (9.34%)   |
| No                                              | 466 (90.66%) |
| <b>Annual household income (USD)</b>            |              |
| <795                                            | 13 (2.53)    |
| 795-2385                                        | 44 (8.56)    |
| 2385-4770                                       | 114 (22.18)  |
| 4770-9539                                       | 133 (25.88)  |
| 9539-15,899                                     | 113 (21.98)  |
| >15,899                                         | 97 (18.87)   |
| <b>Insurance</b>                                |              |
| Labor insurance                                 | 186 (36.19)  |
| Self-paying                                     | 305 (59.34)  |
| Unclear                                         | 23 (4.47)    |

298 3.2. Pre-diagnosis Direct Costs

299 Among the 338 patients who incurred ~~costs due to consultation~~ consultation expenditures,  
300 the median outpatient medical cost incurred pre-diagnosis was 64USD (IQR 24-159) per  
301 patient. Twenty-two patients were admitted to the hospital before TB was diagnosed. Hospital  
302 patients incurred a substantial higher out-of-pocket expenditure. The median hospital  
303 expenditure was 477USD (IQR 318-823). The non-medical costs refer to transportation and  
304 accommodation fees. This study surveyed only the transportation fees for patients before  
305 diagnosis. The median transportation fee was 2USD (IQR 0-8). Costs due to the prescribing of  
306 non-TB drugs and diagnosis costs accounted for a high proportion of direct expenditures in  
307 the pre-diagnosis period (97.0%).

308 3.3. Post-diagnosis Direct Costs

309 A patient's average number of health-care visits after TB was diagnosed was 9.7, with a  
310 maximum of 15 visits. The direct costs after TB was diagnosed were 748USD (IQR 567-987);  
311 the average cost for one visit was 77USD. Median medical cost was 542USD (IQR 465-618),  
312 then we further analyzed what constituted medical costs. Median costs for examinations and  
313 non-TB drugs were 307USD (IQR 273-341) and 211USD (IQR 166-265), respectively, which  
314 were clearly the most robust components, accounting for 55% and 40% of medical costs,  
315 respectively. Meanwhile, the auxiliary drugs, such as liver/kidney protection drugs and  
316 immunopotentiators, constituted the main part of non-TB drugs, with a median cost of  
317 174USD (IQR 135-219), accounting for 83% of the non-TB drug costs.

318 The non-medical costs in the post-diagnosis period included transportation generated by  
319 patients and companions and supplementary food for patients. The median transportation  
320 cost was 19USD (IQR 10-31); the average cost for a single event was 3USD. Among the  
321 surveyed patients, 196 were escorted during treatment by their family or friends, and the  
322 median transportation cost was 5USD (IQR 2-13). About 340 patients improved nutrition with  
323 supplementary food, and the median cost was 302USD (IQR 127-489). The non- medical costs  
324 totaled 150USD (IQR 29-410). Clearly, the non-medical costs were relatively low (Table 2).  
325 The direct costs of intensive phase (the first two month ) and consolidation phase(the next 4 or 6  
326 month) was 1324.5(1037,1759) and 3248.5(2465,4424.1) 210.58(164.87,279.66) USD and  
327 516.48(391.91,703.39) USD respectively. The direct costs of consolidation phase accounted for  
328 70.7% of total pre-~~diagnosis~~ diagnosis direct costs.

329 3.4. Opportunity Costs

330 Only 49 patients reported income lost while away from work due to seeking health care  
331 before diagnosis. Income lost by those patients, incurred during the pre-diagnosis period up to  
332 standard anti-TB treatment, was 32USD (IQR 16-83). Most of the opportunity costs were from  
333 lost income after TB was diagnosed (Table 2), because most patients were fired or could not  
334 physically continue working. For the pre-diagnosis period, the income loss was calculated  
335 based on each patient's daily income before illness (median, 32USD), multiplied by the total  
336 time the patient was out of work due to illness (median, 2 days,  $n = 49$ ), mainly due to travel  
337 and consultation time at different health-care facilities. For the post-diagnosis period, the  
338 monthly income reduction for a complete treatment cycle was summed. The income lost at  
339 two stage of treatment was 31.80(0, 63.60) USD and 127.19(38.16, 683.66) USD~~200(0,400) and~~  
340 ~~800(240,4300).~~ Most income lost ~~comed form~~ came from the consolation phase. The  
341 opportunity cost during consolidation period accounted for 79% of total post-diagnosis  
342 oportunity~~opportunity~~ cost. The time lost due to daily drug intake was not calculated in the  
343 current study.

344 3.5. Total Patient and Household Costs

345 The sum of median direct and opportunity patient and household costs was 1218USD  
 346 (IQR 826-1963), which corresponds to 26% of annual individual incomes before TB illness  
 347 (4770USD). The direct costs accounted for 61% of the total costs, and the ratio of direct to  
 348 opportunity costs was 1.58. About 88.2% (1074/1218) of costs (Fig 1) were encountered after  
 349 the patients were diagnosed and accepting free DOTS treatment.

350 [Figure 1. All patients' average cost during different episodes of tuberculosis treatment. \\*The](#)  
 351 [median of opportunity costs before diagnosis was zero.](#)

352 [Figure 1 legends:](#) ■ direct cost ■ opportunity cost

353 **Table 2.** [Mean Median](#) direct and opportunity costs of TB patients during different  
 354 episodes of [treatment in the study of Bao'an district, Shenzhen City, China, 2013-](#)

| Timing and Types of Costs                       | Patient-reported costs during this Period |            |                      | All Patients***<br>(n = 514) |
|-------------------------------------------------|-------------------------------------------|------------|----------------------|------------------------------|
|                                                 | Number*                                   | %          | Median** (IQR range) |                              |
| <b>Pre-diagnosis</b>                            |                                           |            |                      |                              |
| <b>Direct costs</b>                             |                                           |            |                      |                              |
| Outpatient medical costs                        | 338                                       | 66         | 64 (24-159)          | 19 (0-79)                    |
| Hospital costs                                  | 22                                        | 4          | 477 (318-823)        | 0 (0-0)                      |
| Transportation costs                            | 338                                       | 66         | 2 (0-8)              | 0 (0-3)                      |
| <b>Pre-diagnosis direct costs<sup>d</sup></b>   |                                           |            |                      | <b>79 (24-191)</b>           |
| <b>Opportunity costs</b>                        |                                           |            |                      |                              |
| Foregone income before diagnosis                | 49                                        | 10         | 32 (16-83)           | 0 (0-0)                      |
| <b>Median cost of pre-diagnosis<sup>d</sup></b> |                                           |            |                      | <b>79 (25-204)</b>           |
| <b>Post-diagnosis</b>                           |                                           |            |                      |                              |
| <b>Direct costs</b>                             |                                           |            |                      |                              |
| <b>Medical costs</b>                            | <b>514</b>                                | <b>100</b> | <b>542 (465-618)</b> | <b>542 (465-618)</b>         |
| Examination                                     | 514                                       | 100        | 307 (273-341)        | 307 (273-341)                |
| Non-TB drugs                                    | 514                                       | 100        | 211 (166-265)        | 211 (166-265)                |
| Auxiliary drugs                                 | 514                                       | 100        | 174 (135-219)        | 174 (135-219)                |
| Others                                          | 514                                       | 100        | 21 (20-24)           | 21 (20-24)                   |
| <b>Transportation</b>                           |                                           |            |                      |                              |
| For patients                                    | 514                                       | 100        | 19 (10-31)           | 19 (10-31)                   |
| For companions                                  | 196                                       | 38         | 5 (2-13)             | 0 (0-3)                      |
| <b>Supplementary food</b>                       | <b>340</b>                                | <b>66</b>  | <b>302 (127-489)</b> | <b>127 (0-376)</b>           |
| <b>Post-diagnosis direct costs</b>              |                                           |            |                      | <b>748 (567-987)</b>         |
| <b>Opportunity costs</b>                        |                                           |            |                      |                              |
| Foregone income of patients                     | 402                                       | 78         | 241 (90-1,181)       | 114 (24-797)                 |
| Foregone income of companions                   | 196                                       | 38         | 39 (16-84)           | 0 (0-24)                     |
| <b>Median cost of post-diagnosis</b>            |                                           |            |                      | <b>1074 (745-1820)</b>       |
| <b>Total direct cost</b>                        |                                           |            |                      | <b>833 (609-1132)</b>        |
| <b>Total opportunity cost</b>                   |                                           |            |                      | <b>157 (57-855)</b>          |

355 ~~a>Total~~ Total number of patients, 514.

356 ~~b>The~~ The average cost among patients who generated this kind of ~~expenditure costs~~ in  
357 row 2.

358 ~~cThe~~ The average cost for all patients (514).

359 ~~dPre~~ Pre-diagnosis direct cost = direct costs + transportation costs. Median cost of  
360 pre-diagnosis = direct costs + opportunity costs.

361 3.6. ~~Factors Related to Economic Burden~~ The differential association of pre-diagnosis costs  
362 among tuberculosis patients

363

364 The socio-demographic and care-seeking level characteristics of pre-diagnosis costs  
365 were summarized in table 23. We explored factors related to costs and income loss  
366 separately. In the single-factor analysis, as shown in Table 3, Those re-treated patients  
367 had more costs compared with newly patients (P=0.05) and patients who were in  
368 hospital due to tuberculosis generated more costs (P<0.0001). It seemed that the more  
369 number of times visiting to health-care facilities (P=0.05), the longer of delay of  
370 diagnosis(P<0.0001) and delay of first visiting health-care facilities when symptom onset.

371 The direction and significance of association between the pre-diagnosis costs and the  
372 number of times visiting to health-care facilities, whether in hospitals due to tuberculosis  
373 before diagnosis did not changed after a confounder adjusted analysis in linear regression  
374 analysis . However-, the increase in delay of diagnosis was not found to be statistically  
375 significant in adjusting analysis (Table 54). But we found those who received higher  
376 education or occupied in national civil servant/services /retired staff might expense more  
377 before diagnosis in the linear regression analysis too. In the corresponding generalized linear  
378 regression, number of times visiting health-care facilities was found to be related  
379 pre-diagnosis costs statically significant (P<0.0001). (Table 65)

380 3.7 The differential association of post-diagnosis costs among tuberculosis patients

381 The socio-demographic characteristics of post-diagnosis costs had been depicted in Table  
382 6. Migrant population might have more costs during the tuberculosis treatment compared  
383 with native population (p=0.003-). There were difference of costs after diagnosis as TB among  
384 different education level patients (P=0.039). Those who perceived that the TB imposed  
385 economic burden to household might have more expenses on the treatment (P=0.021).The  
386 status of sputum smear test at the time of diagnosis was positive generate more costs  
387 compared to the negative (P<0.0001).

388 After a confounder adjusted analysis, the direction and significance of association of  
389 post-diagnosis costs and the household registration (migrant or native residents), reported  
390 economic burden of households, sputum smear status did not changed (Table 7). The  
391 divorced or widowed patients had more costs compared to the unmarried in the linear  
392 regression analysis (p=0.044). In the corresponding generalized linear regression, only  
393 sputum smear status adopted in the model. (P<0.0001). (Table 68)

394 -

395  
396  
397

**Table 3. Association of pre-diagnosis costs by background characteristics and care-seeking behaviors among tuberculosis patients enrolled in the study of Bao'an district, Shenzhen City, China, 2013**

| variables                                                    | Number | %      | median(IQR range) of pre-diagnosis cost | P       |
|--------------------------------------------------------------|--------|--------|-----------------------------------------|---------|
| <b>Gender</b>                                                |        |        |                                         |         |
| Female                                                       | 116    | 34.32  | 68.37(18.28,166.14)                     | 0.121   |
| Male                                                         | 222    | 65.68  | 81.48(31.8,240.39)                      |         |
| <b>age</b>                                                   | 338    | 100.00 | 79.5(25.2,204.43)                       | 0.723   |
| <b>Household registration</b>                                |        |        |                                         |         |
| Native patients                                              | 21     | 6.21   | 34.98(23.85,158.99)                     | 0.15    |
| Migrant patients                                             | 317    | 93.79  | 79.5(25.44,205.63)                      |         |
| <b>Marital status</b>                                        |        |        |                                         |         |
| unmarried                                                    | 105    | 31.07  | 79.5(23.85,238.49)                      | 0.158   |
| married                                                      | 217    | 64.20  | 79.5(25.44,190.79)                      |         |
| widowed/divorced                                             | 7      | 2.07   | 79.5(58.03,203.67)                      |         |
| others                                                       | 9      | 2.66   | 50.88(19.71,317.98)                     |         |
| <b>Education</b>                                             |        |        |                                         |         |
| Primary/illiterate                                           | 48     | 14.20  | 72.5(17.01,168.53)                      | 0.171   |
| Junior high school                                           | 139    | 41.12  | 66.78(23.85,164.55)                     |         |
| Senior high school                                           | 110    | 32.54  | 79.5(31.8,182.84)                       |         |
| college or above                                             | 41     | 12.13  | 174.89(47.7,386.88)                     |         |
| <b>Occupation</b>                                            |        |        |                                         |         |
| Workers                                                      | 203    | 60.06  | 78.7(23.85,222.59)                      | 0.401   |
| Individual business                                          | 37     | 10.95  | 66.78(23.85,164.55)                     |         |
| Others (national civil servant/services /retired staff etc.) | 64     | 18.93  | 123.22(57.63,328.31)                    |         |
| Unemployed                                                   | 34     | 10.06  | 174.89(47.7,386.88)                     |         |
| <b>Number of times visiting health-care facilities</b>       |        |        |                                         |         |
| <=2                                                          | 214    | 63.31  | 34.18(15.9,95.39)                       | <0.0001 |
| 3~6                                                          | 101    | 29.88  | 158.99(81.08,289.36)                    |         |
| >=7                                                          | 23     | 6.80   | 724.52(328.79,724.52)                   |         |
| <b>health-care facilities for the first time</b>             |        |        |                                         |         |
| community healthcare center                                  | 71     | 21.01  | 100.69(37.36,283)                       | 0.05    |
| public facility                                              | 48     | 14.20  | 95.39(63.6,249.61)                      |         |
| general hospital                                             | 136    | 40.24  | 48.02(15.9,174.89)                      |         |
| private clinics                                              | 38     | 11.24  | 57.55(23.85,127.19)                     |         |

|                                                                                  |     |       |                         |         |
|----------------------------------------------------------------------------------|-----|-------|-------------------------|---------|
| others                                                                           | 45  | 13.31 | 87.44(31.8,174.89)      |         |
| <b>delay between symptom onset and first <del>consultation</del>consultation</b> |     |       |                         |         |
| <=7                                                                              | 152 | 44.97 | 80.29(28.14,271.48)     |         |
| 7~14                                                                             | 38  | 11.24 | 73.93(31.8,174.89)      | 0.375   |
| 14~21                                                                            | 42  | 12.43 | 64.39(17.49,119.24)     |         |
| >=21                                                                             | 106 | 31.36 | 79.5(19.71,174.89)      |         |
| <b>delay of diagnosis</b>                                                        |     |       |                         |         |
| <=7                                                                              | 186 | 55.03 | 32.91(15.9,96.67)       |         |
| 7~14                                                                             | 35  | 10.36 | 79.5(37.92,167.73)      | <0.0001 |
| >14                                                                              | 117 | 34.62 | 166.94(81.08,479.83)    |         |
| <b>Whether in the hospital due to TB</b>                                         |     |       |                         |         |
| yes                                                                              | 22  | 6.51  | 1203.28(675.71,1564.46) | <0.0001 |
| no                                                                               | 316 | 93.49 | 71.55(23.85,1669.55)    |         |
| <b>The degree of symptoms at diagnosis</b>                                       |     |       |                         |         |
| None                                                                             | 50  | 14.79 | 76.63(17.49,280.88)     |         |
| Mild                                                                             | 112 | 33.14 | 69.96(23.85,172.9)      | 0.412   |
| Moderate                                                                         | 88  | 26.04 | 80.61(31.8,173.94)      |         |
| Severe                                                                           | 88  | 26.04 | 82.2(31.8,302.08)       |         |
| <b>History of TB</b>                                                             |     |       |                         |         |
| New patients                                                                     | 315 | 93.20 | 78.7(23.85,190.79)      | 0.05    |
| Re-treated patients                                                              | 23  | 6.80  | 100.69(48.49,297.98)    |         |

398

399

400

401

402

Table 4 Confounder adjusted association between *pre-diagnosis* diagnosis costs and various predictor variables using linear regression models in the study of Bao'an district, Shenzhen City, China, 2013 (n=338)

| Predictors in the model                         | Beta coefficient | (95% CI)     | P value | VIF  |
|-------------------------------------------------|------------------|--------------|---------|------|
| Number of times visiting health-care facilities | 0.12             | (0.11,0.14)  | < 0.001 | 1.05 |
| <b>whether in hospital due to TB (ref: no)</b>  |                  |              |         |      |
| yes                                             | -1.02            | (-1.2,-0.84) | < 0.001 | 1.03 |
| <b>education (ref:Primary/illiterate)</b>       |                  |              |         |      |
| college or above                                | 0.26             | (0.12,0.39)  | < 0.001 | 1.03 |
| <b>Occupation(ref:workers)</b>                  |                  |              |         |      |

|                                                              |      |             |      |      |
|--------------------------------------------------------------|------|-------------|------|------|
| Others (national civil servant/services /retired staff etc.) | 0.13 | (0.02,0.24) | 0.02 | 1.03 |
| <b>History of TB (ref: new patients)</b>                     |      |             |      |      |
| Re-treated patients                                          | 0.22 | (0.04,0.40) | 0.02 | 1.02 |

403  
404  
405  
406  
407  
408

**Table 5** Confounder adjusted association between *pre-diagnosis\* costs* and various predictor variables using logistic regression models in the study of Bao'an district, Shenzhen City, China, 2013 (n=338)

| predictor in the model                          | B            | Exp(B)       | (95% CI)      | P value          |
|-------------------------------------------------|--------------|--------------|---------------|------------------|
| Number of times visiting health-care facilities | <b>0.818</b> | <b>2.267</b> | (1.760,2.919) | <b>&lt;0.001</b> |
| <b>History of TB (ref: new patients)</b>        |              |              |               |                  |
| Re-treated patients                             | 1.001        | 2.721        | (1.037,7.140) | 0.042            |
| <b>Education(ref:Primary/illiterate)</b>        |              |              |               |                  |
| Junior high school                              | -1.760       | 0.172        | (0.062,0.475) | 0.001            |
| Senior high school                              | -1.168       | 0.311        | (0.137,0.705) | 0.005            |
| college or above                                | -.901        | 0.406        | (0.176,0.936) | 0.034            |
| <b>delay of diagnosis</b>                       | -.014        | 0.986        | (0.971,1.001) | 0.062            |
| <b>constant</b>                                 | -1.920       | 0.147        |               | 0.003            |

409  
410  
411  
412

\*Pre-diagnosis costs in generalised linear model (logistic regression) was categorized based on median value among all participants

413  
414  
415

**Table 6** Association of post-diagnosis costs by background characteristics and care-seeking behaviors among tuberculosis patients enrolled in the study of Bao'an district, Shenzhen City, China, 2013

| Variables     | Number | %      | median(IQR range) of pre-diagnosis cost | p     |
|---------------|--------|--------|-----------------------------------------|-------|
| <b>Gender</b> |        |        |                                         |       |
| Female        | 178    | 34.63% | 1128.91(764.9,1717.51)                  | 0.309 |
| Male          | 336    | 65.37% | 1128.91(764.9,1717.52)                  |       |

|                                                              |     |        |                         |         |
|--------------------------------------------------------------|-----|--------|-------------------------|---------|
| Age                                                          | 514 | 100%   | 1074.38(745.35,1818.69) | 0.177   |
| <b>Household registration</b>                                |     |        |                         |         |
| Native patients                                              | 26  | 5.06%  | 760.93(489.53,1277.49)  | 0.003   |
| Migrant patients                                             | 488 | 94.94% | 1096.24(757.65,1852.85) |         |
| <b>Marital status</b>                                        |     |        |                         |         |
| unmarried                                                    | 180 | 35.02% | 1103.47(743.68,1864.68) | 0.193   |
| married                                                      | 308 | 59.92% | 1018.08(746.43,1719.76) |         |
| widowed/divorced                                             | 10  | 1.95%  | 2208.69(844.63,3183.62) |         |
| others                                                       | 16  | 3.11%  | 879.98(691.18,1803.74)  |         |
| <b>Education</b>                                             |     |        |                         |         |
| Primary/illiterate                                           | 63  | 12.26% | 859.61(662.77,1398.92)  | 0.039   |
| Junior high school                                           | 220 | 42.80% | 1150.77(827.62,1921.22) |         |
| Senior high school                                           | 169 | 32.88% | 1021.42(722.61,1632.99) |         |
| college or above                                             | 62  | 12.06% | 1064.25(682.54,1924.26) |         |
| <b>Occupation</b>                                            |     |        |                         |         |
| Workers                                                      | 203 | 60.06% | 78.7(23.85,222.59)      | 0.772   |
| Individual business                                          | 37  | 10.95% | 66.78(23.85,164.55)     |         |
| Others (national civil servant/services /retired staff etc.) | 64  | 18.93% | 123.22(57.63,328.31)    |         |
| Unemployed                                                   | 34  | 10.06% | 174.89(47.7,386.88)     |         |
| <b>Sputum smear status</b>                                   |     |        |                         |         |
| negative                                                     | 287 | 55.84% | 963.15(699.21,1601.36)  | <0.0001 |
| positive                                                     | 227 | 44.16% | 1222.47(803.39,1982.94) |         |
| <b>Interruption of treatment</b>                             |     |        |                         |         |
| Yes                                                          | 67  | 13.04% | 1084.95(801.68,1412.53) | 0.572   |
| No                                                           | 447 | 86.96% | 1067.95(740,1864.68)    |         |
| <b>Household economic burden</b>                             |     |        |                         |         |
| Heavy                                                        | 149 | 28.99% | 1153.54(787.48,1976.25) | 0.021   |
| Moderate                                                     | 236 | 45.91% | 1096.28(740.46,1888.75) |         |
| No burden                                                    | 129 | 25.10% | 961.76(668.92,1344.58)  |         |
| <b>Adverse drug reaction</b>                                 |     |        |                         |         |
| Yes                                                          | 268 | 52.14% | 1112.96(743.44,1852.95) | 0.447   |
| No                                                           | 246 | 47.86% | 1009.81(745.35,1792.01) |         |
| <b>The degree of symptoms at diagnosis</b>                   |     |        |                         |         |
| None                                                         | 131 | 25.49% | 1009.75(733.98,1810.5)  | 0.737   |



|                      |     |        |                         |       |
|----------------------|-----|--------|-------------------------|-------|
| Mild                 | 181 | 35.21% | 1014.74(719.11,1654.26) |       |
| Moderate             | 103 | 20.04% | 1143.66(770.15,1728.62) |       |
| Severe               | 99  | 19.26% | 1140.12(757.65,1971.92) |       |
| <b>History of TB</b> |     |        |                         |       |
| New patients         | 484 | 94.16% | 1043.25(733.95,1817)    | 0.064 |
| Re-treated patients  | 30  | 5.84%  | 1293.75(956.37,1911.22) |       |

416  
417  
418  
419

**Table 7** Confounder adjusted association between *post-diagnosis costs* and various predictor variables using linear regression models in the study of Bao'an district, Shenzhen City, China, 2013 (n=514)

| Predictors in the model                                   | Beta coefficient | (95% CI)        | P value | VIF   |
|-----------------------------------------------------------|------------------|-----------------|---------|-------|
| <b>Sputum smear status (ref: negative)</b>                |                  |                 |         |       |
| positive                                                  | 0.08             | (0.036,0.128)   | < 0.001 | 1.005 |
| <b>household registration (ref: Native patients)</b>      |                  |                 |         |       |
| Heavy                                                     | 0.15             | (0.043-0.254)   | 0.006   | 1.032 |
| <b>reported-household economic burden (ref:no burden)</b> |                  |                 |         |       |
| Heavy                                                     | -0.06            | (-0.109,-0.003) | 0.040   | 1.038 |
| <b>marital status (ref:unmarried)</b>                     |                  |                 |         |       |
| widowed/divorced                                          | 0.17             | (0.04,0.333)    | 0.044   | 1.03  |

420  
421  
422

**Table 8** Confounder adjusted association between *post-diagnosis\* costs* and various predictor variables using logistic regression models in the study of Bao'an district, Shenzhen City, China, 2013 (n=514)

| predictor in the model                      | B      | Exp(B) | (95% CI)      | P value |
|---------------------------------------------|--------|--------|---------------|---------|
| <b>Sputum smear status (ref: negative )</b> |        |        |               |         |
| positive                                    | 0.653  | 1.921  | (1.350,2.735) | <0.001  |
| constant                                    | -0.288 | 0.750  |               | 0.016   |

427  
428

#### 4. Discussion

This study evaluated the economic burden borne by TB patients in Shenzhen City during their illness. [We included 533 eligible patients in the survey, 19 of which were lost to](#)

431

432 follow-up. The average age of them was 29.6±10.2years. The male was 14 and female was 5.  
433 One patient was with a severe symptoms appeared hemoptysis. The others were with mild or  
434 moderate symptoms like cough, chest distress and fever etc. the lost to follow-up was about 4  
435 percent, and the general Socio-demographic and clinical characteristics of those 19  
436 participants lost to follow-up were identical with the 514 patients. So, we considered there no  
437 much influence on our conclusion.

438 As one of the most population of Shenzhen district and owing numbers of factories, the  
439 migrant population in Baoan always exceeds the average level of Shenzhen city. The total  
440 number of registered active tuberculosis cases were 1317, included 76(5.8%) native case and  
441 1241(94.2%) migrant cases in 2013[15]. In our study, 95 percent were migrant cases, and about  
442 80% of patients were factory workers or service staffs who general were in a poor economic  
443 status and poor living environment. ~~As shown above, even in a high income level district  
444 where the proportion of people with health insurance is relatively higher than in other regions  
445 of China, tuberculosis patients do experience high out of pocket expenditures.  
446 Furthermore, Under the DOTS program, the CPC provide tuberculosis patients with a  
447 radiologic imaging studies (X-ray), sputum smear tests and anti-TB drug during treatment for  
448 free amounting to 102.07USD. post diagnosis costs accounted for 88.2% (1074/1218) of total  
449 costs. We found that the migrant patients faced much costs during TB treatment.this treatment.~~  
450 This may be owing to the different mode of payment and free strategy. -The current study  
451 confirmed that TB patients are from vulnerable groups, and that migrant groups working in  
452 factories face worse living conditions and lower average income than the general population.

453 The median household ~~expenditures-costs~~ found in this study (1218USD) were far higher  
454 than those in Africa, India, and rural China [16-18]. These differences could partly be  
455 explained by the differences in purchasing power among these countries/districts and/or due  
456 to the omission of some cost elements in these studies. The more important reason may be the  
457 prospective follow-up design of this study, which reduced recall bias. ~~Further, the total costs  
458 presented here took into account the fact that patients incurred costs after the end of  
459 treatment, required by doctors to consolidate cure for two or three months, depending on the  
460 level of patient recovery. Anti TB drugs and sputum smear tests at this stage were paid for by  
461 patients themselves.~~

462 We found that, one year prior to the study, 78.5% percent of patients had annual  
463 household incomes between 795 and 15,899USD, while 13 patients made less than 795USD a  
464 year. The direct and opportunity costs corresponded to 26% (1218/4685) of annual personal  
465 income. These costs constituted a considerable part of their disposable income after payment  
466 of fixed costs such as rent, electricity, and water, along with insurance. Moreover, patients  
467 must face these costs for more than 6 months; over a quarter of patients reported that the  
468 economic burden of cure was heavy. Twenty-three patients reported incurring debts due to  
469 illness. Factory workers and the unemployed had to rely on help from their families. Some  
470 authors have concluded that all costs to TB patients account for a higher percentage of their  
471 annual income [16, 19-21]. For example, a survey in three countries showed that  
472 treatment-related costs were equivalent to approximately one year of individual income [22].  
473 The differences between these studies and ours may be explained by social background,  
474 ~~insurance systems,~~ and a higher income level in our study population.

475 Direct costs are still substantial, with non-TB drugs and auxiliary examinations as the  
476 most significant cost items [23-25]. Additional drugs, such as those for protecting the  
477 liver/kidney or symptomatic treatment, and examinations must be paid for, and it appears  
478 that this led to the high ~~out of pocket expenditures-costs~~ during the treatment period,  
479 indicating that there may be over-prescription and over-service, as reported in other studies  
480 [2326, 2427]. Although income loss and time loss have not affected every tuberculosis patient  
481 interviewed, a considerable number of patients reported being negatively influenced by the  
482 disease and concomitant income and time loss. About 37% (190/514) of the patients were

483 unemployed or suspended from work after contracting TB and had no income, while the  
484 others remained employed and experienced income loss due to monthly doctor visits. Only  
485 36% of patients had insurance through the workplace. Patients reported that only a small  
486 fraction of medical costs could be reimbursed, and if they became unemployed, their  
487 insurance could lapse. Fifty-nine percent of patients had no insurance. Thus, departure from  
488 daily money-earning activities had a negative economic impact on patients with TB, resulting  
489 in impoverishment and worsening their living situations [2923]. However, the opportunity  
490 costs in these cases may be underestimated, since the value of time loss due to daily drug  
491 intake was not calculated, and some patients reported that they had no clear concept of their  
492 reduced income due to absences from the workplace.

493 Out-of-pocket costs and income loss pre-diagnosis were much lower compared with  
494 those post-diagnosis, accounting for less than 10% of total costs. This is consistent with reports  
495 from other studies [2528, 2629]. A review of the financial burden of tuberculosis indicated that  
496 half of total costs were incurred before treatment [2730]. The possible reason for this may be  
497 that individuals found it difficult to comprehend the concept of calculating the monetary  
498 value of unpaid work, and many of the patients in this study were found as a result of the  
499 health check-ups required by their work units. Those suspected patients were initially referred  
500 to the CSC for diagnosis, and the first X-ray and sputum smear test were free for them. The  
501 delay of diagnosis and number of times visiting health-care facilities were decreased and less  
502 costs incurred. We find that those who accepted higher education and occupied in national  
503 civil servant/services or retired staff may incur more costs before diagnosis. Those patients  
504 may have a good economic condition and care more about self-health conditionsconditions.

505 Less than one-fifth of patients initially visited a public health-care facility at the onset of  
506 TB symptoms. This led to long delays in the identification of a treatment-seeking pathway  
507 before a proper diagnosis was confirmed. The reasons for this may be gender, education, and  
508 economic conditions in terms of patients who missed the perfect treatment period, resulting in  
509 an advanced disease [2831]. Financial considerations are a major factor contributing to  
510 health-seeking behavior in the Chinese population [2932]. Inefficiencies in public health  
511 facilities and control services at private facilities are the two main constraints responsible for  
512 prolonged delay and increased costs of TB diagnosis [3033, 3134]. In our analysis, we found  
513 visiting times as one of the factors affecting related ~~direct-pre-dignosis~~diagnosis costs, with a  
514 mean of 3 visits to different health-care facilities. Only 35.6% of patients reported that they  
515 were diagnosed with suspected tuberculosis at their first visit, and the rest were informed that  
516 they had pneumonia, pleurisy, a cold, and so on. Consistent with our study, other  
517 investigators pointed out that early diagnosis of tuberculosis reduced costs while achieving  
518 treatment success [3235, 3336]. Given that TB case detection under the current DOTS strategy  
519 in China is through passive case findings, it is imperative to increase patient and community  
520 health education and, further, to strengthen the consciousness and capacity of grass-roots  
521 public facilities to transfer suspected TB patients to better-equipped hospitals through  
522 improved work motivation.

523 Treatment interruption is defined as any interruption of treatment for at least one day but  
524 for < 8 consecutive weeks [3437], which has been proven to be a risk factor in treatment failure,  
525 drug resistance, relapse, and death [3538, 3639]. Economic disadvantage is strongly associated  
526 with non-adherence to TB treatment [3740]. Meanwhile, the link between medical costs and  
527 adherence in China has been proven [3841]. In ~~our this~~ study, we ~~didn't -foundfind -~~that this  
528 ~~was also a risk factor~~ related to high treatment costs statistically. But we find that above  
529 seventy percent of post-diagnosis costs occurred during consolidation period. This may be a  
530 economic factor influencing the adherence of treatment. Thirteen percent of patients reported  
531 that they had interrupted treatment for more than two months, mainly due to: first,  
532 side-effects from drugs, when patients experienced a heavy adverse reaction such as liver  
533 damage, especially at the intensive period, which always required doctors to stop treating to

534 protect the liver; second, when patients returned to their home towns, where current strategies  
535 prevented them from taking anti-TB drugs beyond one month, so many chose to stop  
536 treatment; and finally, more than 90% of the patients who discontinued treatment did so  
537 during the continuation phase of treatment, reportedly because, during this phase, most  
538 symptoms disappeared and patients erroneously believed that they were cured, making them  
539 reluctant to bear the extra burden of the medical costs and income loss. High treatment costs  
540 may deter patients who have the most income loss from continuing treatment [3942]. The  
541 patients who stopped treatment usually developed advanced disease difficult to cure,  
542 resulting in a longer period of cure and, in turn, higher costs. This seems to be a vicious cycle  
543 whereby expenditures increase while interruption leads to more expenditures. Other factors,  
544 such as inconvenient daily drug intake and work obligations, were also taken into  
545 consideration by the patients.

546 Although gender was associated with higher costs in some studies [4043], we found no  
547 difference in costs between male and female patients, consistent with results from another  
548 study [4144]. Re-treated patients and ~~those with severe symptoms~~ sputum smear positive  
549 patients may have higher expenditures during different treatment episodes due to a longer  
550 treatment period and more complicated conditions.

551 This study may seem to be only partly representative of Shenzhen City, since only one  
552 district was included. However, the study is representative of most tuberculosis patients in  
553 Shenzhen City, because about 50% of all cases under DOTS came from the study site. The  
554 re-treatment rate in our study was 5.84%, which is similar to that reported in other studies,  
555 with a re-treatment rate of 6.7% in Shenzhen [4245] and 6.4% in other provinces in China  
556 [4346]. This indicates that our study was acceptably representative of the treatment  
557 conditions for TB patients in Shenzhen specifically and China generally. As other studies  
558 related to the household costs of tuberculosis, this study also relied on self-reported costs of  
559 pre-diagnosis and household income. Thus, recall and reporting bias could not be avoided,  
560 ~~even in this longitudinal design.~~ Hence, we conducted the first interviews of patients after one  
561 month of treatment ~~within two months of their starting treatment,~~ to reduce recall time.  
562 Interviewers were also trained to reduce the bias by logic-checking the information from the  
563 registration system and recognizing unusually high costs for specific items. In addition, asking  
564 patients to calculate the monetary value of unpaid work proved to be difficult, even though  
565 our interviewers explained as much as they could.

566 Our study does have some limitations. First, our study only investigated the economic  
567 burden of patients brought by TB and those with severe co-morbidities such as AIDS, diabetes,  
568 and lung cancer and older than 59 were excluded. Therefore our study may reflect the  
569 economic burden faced by patients result from TB instead of all population and all kinds of  
570 diseases. Second, in our study, we did not survey the information regarding companion costs  
571 although it may not have much impact on the results since most TB patients in China did not  
572 need to be companion during the treatment. Third, we collected the range of the household's  
573 pre-TB annual income of every patient instead the exact number. As a result, we are not able  
574 to conduct the analysis regarding catastrophic cost.

## 575 5. Conclusions

576 In conclusion, patients and their households face heavy expenditures due to the costs of  
577 TB care, which accounted for 26% of patients' annual income. Costs were not equally spread  
578 over time, but in the post-diagnosis period, the costs are highest, exacerbating the problem of  
579 affordability. Free TB drugs are not the same as free treatment, and non-TB drugs,  
580 examinations, and loss of income are important considerations for patients. The income loss  
581 among all patients averaged 157USD (IQR 57-855). More visits to health-care facilities  
582 generated more out-of-pocket costs. Patients who had severe symptoms and re-treated  
583 patients bore a heavier burden. For high costs to be avoided, more attention should be paid to

584 TB patients, even under the DOTS strategy. TB patients require testing methods with higher  
585 sensitivity, higher specificity, and lower costs to reduce their need for visits to health-care  
586 facilities, along with more instructions to improve their adherence to treatment, leading to  
587 lower re-treatment rates.  
588

589 **Acknowledgments:** The authors thank the participants who responded to our questionnaires and the TB  
590 doctors who participated in the questionnaire survey. We also express our deep gratitude to the staffs of  
591 the Bao'an Chronic Disease Prevention and Cure Hospital and the Center for Tuberculosis Control of  
592 Guangdong Province.

## 593 **References**

- 594 1. Global tuberculosis report 2018. World Health Organization: Geneva, Switzerland,  
595 2018. Licence: CC BY-NC-SA 3.0 IGO.
- 596 2. China Tuberculosis Control Collaboration. The effect of tuberculosis control in China  
597 [J]. *Lancet* 2004, 364, 417–422.
- 598 3. Yu, X.; Song, H.F.; Feng, Y.J.; Ye, Z.J. Significance of Gene Xpert-MTB/RIF assay in  
599 diagnosis of tuberculosis. *J. Practical Med.* 2019, 35, 985–988.
- 600 4. Liu, Y.; Xu, C.H.; Wang, Z.Y.; et al. [A cross-sectional study on economic burden of  
601 pulmonary tuberculosis cases from designated tuberculosis hospital]. *Zhonghua Liu Xing  
602 Bing Xue Za Zhi.* 2019, 40, 559–564 [article in Chinese].
- 603 5. Chen, S.; Zhang, H.; Pan, Y.; et. al. Are free anti-tuberculosis drugs enough? An  
604 empirical study from three cities in China [J]. *Infectious Diseases of Poverty.* 2015, 4, 47.
- 605 6. Stracker, N.; Hanrahan, C.; Mmolawa, L.; et al. Risk factors for catastrophic costs  
606 associated with tuberculosis in rural South Africa. *Int. J. Tuberc. Lung Dis.* 2019, 23, 756–763.
- 607 7. Li, Y.; Ehiri, J.; Tang, S.; et al. Factors associated with patient, and diagnostic delays in  
608 Chinese TB patients: a systematic review and meta-analysis. *BMC Med.* 2013, 11, 156.
- 609 8. Qiu, S.; Pan, H.; Zhang, S.; et al. Is tuberculosis treatment really free in China? A study  
610 comparing two areas with different management models. *PLoS One.* 2015, 10, e0126770.
- 611 9. Lönnroth, K.; Raviglione, M. The WHO's new End TB Strategy in the post-2015 era of  
612 the Sustainable Development Goals. *Trans. R. Soc. Trop. Med. Hyg.* 2016, 110, 148–150.
- 613 10. Guan, H.Y.; Yang, Y.Z.; Tan, W.G.; et al. Effect evaluation of Shenzhen tuberculosis  
614 control and prevention program implementation from 2001 to 2010 [J]. *Chin. J.  
615 Anti-tuberculosis.* 2013, 9, 729–737.
- 616 11. Liu, J.H.; Zhang, L.; Lu, T.W.; et al. TB control strategy of the preliminary analysis in  
617 Bao'an District [J]. *Prog. Mod. Biomed.* 2010, 21, 4116–4117.
- 618 12. de Cuevas, R.M.; Lawson, L.; Al-Sonboli, N.; et al. Patients direct costs to undergo TB  
619 diagnosis. *Infect. Dis Poverty.* 2016, 5, 24.
- 620 13. P. Vatcheva, K. and M. Lee, Multicollinearity in Regression Analyses Conducted  
621 in Epidemiologic Studies. *Epidemiology: Open Access*, 2016. 06(02)
- 622 14. Feng, C., et al., Log-transformation and its implications for data analysis. *Shanghai  
623 Arch Psychiatry*, 2014. 26(2): p. 105-9.
- 624
- 625 15. ZHANG Juanjuan, HU Fangxiang, WANG Yunxia, et al. Epidemiological  
626 characteristics of tuberculosis in Bao'an District, Shenzhen, 2008-2015. *China Tropical  
627 Medicine*, February 2018, Vol.18, No.2:p128-130
- 628 [16.](#)Ukwaja, K.N.; Modebe, O.; Igwenyi, C.; et al. The economic burden of tuberculosis care  
629 for patients and households in Africa: a systematic review [J]. *Int. J. Tuberc. Lung Dis.* 2012, 16,  
630 733–739.



631 [17.](#) Suen, S.C.; Bendavid, E.; Goldhaber-Fiebert, J.D. Cost-effectiveness of improvements  
632 in diagnosis and treatment accessibility for tuberculosis control in India. *Int. J. Tuberc. Lung*  
633 *Dis.* 2015, 19, 1115–1124.

634 [18.](#) Pan, H.Q.; Bele, S.; Feng, Y.; et al. Analysis of the economic burden of diagnosis and  
635 treatment of tuberculosis patients in rural China [J]. *Int. J. Tuberc. Lung Dis.* 2013, 17,  
636 1575–1580.

637 [19.](#) Gospodarevskaya, E.; Tulloch, O.; Bunga, C.; et al. Patient costs during tuberculosis  
638 treatment in Bangladesh and Tanzania: the potential of shorter regimens [J]. *Int. J. Tuberc.*  
639 *Lung Dis.* 2014, 18, 810–817.

640 [20.](#) Hu, D.; Long, Q.; Chen, J.; Wang, X.; Huang, F.; Ji, J.S. Factors influencing  
641 hospitalization rates and inpatient cost of patients with tuberculosis in Jiangsu Province,  
642 China: an uncontrolled before and after study. *Int. J. Environ. Res. Public Health.* 2019, 16,  
643 21 Onazi, O.; Gidado, M.; Onazi, M.; et al. Estimating the cost of TB and its social impact  
644 on TB patients and their households. *Public Health Action.* 2015, 5, 127–131.

645 [22.](#) Mauch, V.; Bonsu, F.; Gyapong, M.; et al. Free tuberculosis diagnosis and treatment  
646 are not enough: patient cost evidence from three continents [J]. *Int. J. Tuberc. Lung Dis.* 2013,  
647 17, 381–387.

648 [23.](#) Tanvejsilp, P.; Loeb, M.; Dushoff, J.; Xie, F. Healthcare resource uses and out-of-pocket  
649 expenses associated with pulmonary TB treatment in Thailand. *Pharmacoecon. Open.* 2018, 2,  
650 297–308.

651 [24.](#) Pedrazzoli, D.; Siroka, A.; Boccia, D.; et al. How affordable is TB care? Findings from a  
652 nationwide TB patient cost survey in Ghana. *Trop. Med. Int. Health.* 2018, 23, 870–878.

653 [25.](#) Asres, A.; Jerene, D.; Deressa, W. Pre- and post-diagnosis costs of tuberculosis to  
654 patients on Directly Observed Treatment Short course in districts of southwestern Ethiopia: a  
655 longitudinal study. *J. Health Popul. Nutr.* 2018, 37, 15.

656 [2326.](#) Tang, S.; Wang, L.; Wang, H.; Chin, D.P. Access to and affordability of healthcare  
657 for TB patients in China: issues and challenges. *Infect. Dis. Poverty.* 2016, 5, 10.

658 [2427.](#) Jia, X.; Chen, J.; Zhang, S.; Dai, B.; Long, Q.; Tang, S. Implementing a "free"  
659 tuberculosis (TB) care policy under the integrated model in Jiangsu, China: practices and costs  
660 in the real world. *Infect. Dis. Poverty.* 2016, 5, 2.

661 [2528.](#) Fuady, A.; Houweling, T.A.J.; Mansyur, M.; Burhan, E.; Richardus, J.H. Effect of  
662 financial support on reducing the incidence of catastrophic costs among tuberculosis-affected  
663 households in Indonesia: eight simulated scenarios. *Infect. Dis. Poverty.* 2019, 8, 10.

664 [2629.](#) Mullerpattan, J.B.; Udwadia, Z.Z.; Banka, R.A.; Ganatra, S.R.; Udwadia, Z.F.  
665 Catastrophic costs of treating drug resistant TB patients in a tertiary care hospital in India.  
666 *Indian J. Tuberc.* 2019, 66, 87–91.

667 [2730.](#) Tanimura, T.; Jaramillo, E.; Weil, D.; Raviglione, M.; Lönnroth, K. Financial burden  
668 for tuberculosis patients in low- and middle-income countries: a systematic review. *Eur.*  
669 *Respir. J.* 2014, 43, 1763–1775.

670 [2831.](#) Gebreegziabher, S.B.; Bjune, G.A.; Yimer, S.A. Patients' and health system's delays  
671 in the diagnosis and treatment of new pulmonary tuberculosis patients in West Gojjam Zone,  
672 Northwest Ethiopia: a cross-sectional study. *BMC Infect. Dis.* 2016, 16, 673.

673

674 [2932.](#) Li, Y.; Ehiri, J.; Tang, S.; et al. Factors associated with patient, and diagnostic delays  
675 in Chinese TB patients: a systematic review and meta-analysis [J]. *BMC Med.* 2013, 11, 156.

676 [3033.](#) Bogale, S.; Diro, E.; Shiferaw, A.M.; Yenit, M.K. Factors associated with the length of  
677 delay with tuberculosis diagnosis and treatment among adult tuberculosis patients attending  
678 at public health facilities in Gondar town, Northwest, Ethiopia. *BMC Infect. Dis.* 2017, 17, 145.

679 [3134.](#) Osei, E.; Akweongo, P.; Binka, F. Factors associated with DELAY in diagnosis  
680 among tuberculosis patients in Hohoe Municipality, Ghana. *BMC Public Health.* 2015, 15, 721.

681 [3235](#). Pichenda, K.; Nakamura, K.; Morita, A.; et al. Non-hospital DOT and early  
682 diagnosis of tuberculosis reduce costs while achieving treatment success [J]. *Int. J. Tuberc.*  
683 *Lung Dis.* 2012, 16, 828–834.

684 [3336](#). Duan, W.; Zhang, W.; Wu, C.; et al. Extent and determinants of catastrophic health  
685 expenditure for tuberculosis care in Chongqing municipality, China: a cross-sectional study.  
686 *BMJ Open.* 2019, 9, e026638.

687 [3437](#). Jakubowiak, W.; Bogorodskaya, E.; Borisov, S.; et al. Treatment interruptions and  
688 duration associated with default among new patients with tuberculosis in six regions of  
689 Russia [J]. *Int. J. Infect. Dis.* 2009, 13, 362–368.

690 [3538](#). Mekonnen, H.S.; Azagew, A.W. Non-adherence to anti-tuberculosis treatment,  
691 reasons and associated factors among TB patients attending at Gondar town health centers,  
692 Northwest Ethiopia. *BMC Res. Notes.* 2018, 11, 691.

693 [3639](#). de Faria Gomes, N.M.; da Mota Bastos, M.C.; Marins, R.M.; et al. Differences  
694 between risk factors associated with tuberculosis treatment abandonment and mortality.  
695 *Pulm. Med.* 2015, 2015, 546106. doi:10.1155/2015/546106.

696 [37340](#). Wanyonyi, A.W.; Wanjala, P.M.; Githuku, J.; Oyugi, E.; Kutima, H. Factors  
697 associated with interruption of tuberculosis treatment among patients in Nandi County,  
698 Kenya 2015. *Pan Afr. Med. J.* 2017, 28(Suppl 1), 11.

699 [3841](#). Long, Q.; Smith, H.; Zhang, T.; et al. Patient medical costs for tuberculosis treatment  
700 and impact on adherence in China: a systematic review [J]. *BMC Public Health.* 2011, 11, 393.

701 [3942](#). Gorityala, S.B.; Mateti, U.V.; Konuru, V.; Martha, S. Assessment of treatment  
702 interruption among pulmonary tuberculosis patients: a cross-sectional study. *J. Pharm.*  
703 *Bioallied Sci.* 2015, 7, 226–229.

704 [4043](#). Ukwaja, K.N.; Alobu, I.; Abimbola, S.; et al. Household catastrophic payments for  
705 tuberculosis care in Nigeria: incidence, determinants, and policy implications for universal  
706 health coverage [J]. *Infect. Dis. Poverty.* 2013, 2, 21.

707 [4144](#). Zhou, C.; Long, Q.; Chen, J.; et al. Factors that determine catastrophic expenditure  
708 for tuberculosis care: a patient survey in China. *Infect. Dis. Poverty.* 2016, 5, 6.

709 [4245](#). Bao, H.; Liu, K.; Wu, Z.; et al. Tuberculosis among full-time teachers in Southeast  
710 China, 2005–2016. *Int. J. Environ. Res. Public Health.* 2018, 15, 2024. Published 2018 Sep 17.  
711 doi:10.3390/ijerph15092024.

712 [4346](#). Zhu, L.; Yang, Y.Z.; Guan, H.Y.; et al. Trends in drug-resistant tuberculosis after the  
713 implementation of the DOTS strategy in Shenzhen, China, 2000–2013. *Int. J. Tuberc. Lung Dis.*  
714 2017, 21, 759–765. doi:10.5588/ijtld.16.0759.



Additional Editor Comments (if provided):

Dear Authors,

In addition to the valuable points raised by the two reviewers, i have some comments from my end (some of these may be made by the reviewers as well)

1. Abstract - most were from the migrant population - why use ' most' here while elsewhere the number % have been given?

*Thanks for the editor's suggestion. We have replaced 'most' with the exact number '95%' in the abstract, which was mentioned in the line 255.*

2. out of pockets expenditure? Please be careful with use of phrases (point made by the reviewer as well). Are you looking at total costs due to TB care or out of pocket expenditure. Overall in your paper, no reference was made to the WHO TB patient cost survey handbook 2016. I see that the study was among patients registered in 2013 and the WHO ptient cost survey booklet was not out then. Hence, it will be nice ot have a table in methods with clear operational definitions used.

*We are grateful for your suggestion. In our study, we did not include the cost covered by the medical insurance, hence it is inappropriate to use the term 'out of pockets expenditure'. So we replaced it with 'cost' to make it more accurate. There are many kinds of medical insurance in China, and the patients may not be aware of whether they have certain kind of medical insurance or not, so they did not use the medical insurance to reduce their expenditure. However, in our study, the cost is measurable and comparable, so we revised it throughout this article accordingly.*

*According to your advice, we have added the operational definitions in **table 1**.*

3. 2.2 Study design title should be renamed as 2.2 Study design and population

*Revised, thank you.*

4. Anonymized data HAS to be shared and this is ESSENTIAL

*Thanks for this suggestion. We have provided the anonymous data as attachment in an .xls document.*

5. In the ethics statement, please mention the ethics number and the date

*We are grateful for the Reviewer's suggestion. The ethical approval number is 2012-SPH021, date 9/28/ 2012.*

6. Line 175-176 (regarding primary outcome) - this line is not clear

*Thanks for this suggestion. We revised the definition to make it clear in line 192-193 as follows: The primary outcome variables were the mean (median) expense incurred during illness.*

7. Line 191 - shouldn't it be the household's pre-TB annual income?

*We appreciate your suggestion. Our study does have the limitation that we collected the range of the household's pre-TB annual income of every patient instead the exact number. However, we collected the exact number of the total annual income of every patient and as a result, we used the indicator to measure the patients' economic burden.*

8. Line 204-06. Similar issues were faced by us in another study. Another analysis may be to classify the costs as catastrophic or not and then do a log binomial regression. We can present

both the results. See the following paper for example, as to how the analysis was done:  
<https://www.ncbi.nlm.nih.gov/pubmed/30865730>

*We appreciate this suggestion. As mentioned above, we did not consider the catastrophic cost as an indicator in the design phase of our study, so we are not able to conduct the analysis regarding catastrophic cost. In our revision, based on the paper given above, we improved our method of statistics by adopting 2 methods in our revised manuscript.*

9. Line 206 - Bivariate means two outcomes. All the analyses presented in this paper are univariate which can be further classified into single variable (crude or unadjusted) and multivariable (adjusted) analysis.

*Thanks for this suggestion. We have adopted a new method in the data analysis which is described carefully in line 221-244.*

10. What about catastrophic costs, what about inequity in distribution of catastrophic costs. See this paper for example. <https://www.ncbi.nlm.nih.gov/pubmed/30173603>

*We appreciate your suggestion. However, we did not adopt this professional term at the start of the study, and the annual patient income is expressed as a range instead of an exact number. As a result, it would be impossible to calculate the catastrophic costs to patients.*

11. All the table and figure title have to be standalone with details about time place and person. Check for footnotes for abbreviations. All tables should be formatted again to make them presentable. For ex n and % in separate columns. n column should be right indented, (%) column should be left indented and vertical line between n and % should then be removed. Check other tables as well.

*We appreciate your suggestion. We have reformatted the tables throughout the article according to your suggestions.*

12. Why don't the authors look separately at factors associated with pre-dx costs and post-diagnosis costs.

*Thank you for this suggestion. We have analyzed the factors associated with different period of the treatment according to your suggestion and revised the statement in the data analysis, results and discussion section on the basis of the new analysis results.*

13. If the authors have outcome data, why not compare unfav out and catastrophic costs, after adjusting for potential confounders.

*We appreciate your suggestion. However, we did not adopt this professional term at the start of the study, and the annual patient income is expressed as a range instead of an exact number. As a result, it would be impossible to calculate the catastrophic costs to patients.*

Reviewer #1: This work is on an important area namely the economic burden due to Tuberculosis related to the EndTB strategy goal of Zero Catastrophic cost for households due to Tuberculosis. The author have drafted the manuscript well and included several important points needed for a cost analysis study.

The study utilised a follow-up methodology to capture costs during the treatment phase. The authors have also studied some factors related to costs.

While the study justification rightly draws support from the EndTB Goal of Zero Catastrophic Cost, the authors have not included Catastrophic Cost estimation in the paper, despite having all the necessary data for the calculation of the same. It is highly recommended that the authors may include catastrophic cost and accordingly the manuscript may be redrafted. If there are data available on the coping costs or mechanism, they may also be included to understand the complete picture of the economic burden faced by the patients with Tuberculosis.

*We appreciate your suggestion. However, we did not adopt this professional term at the start of the study, and the annual patient income is expressed as a range instead of an exact number. As a result, it would be impossible to calculate the catastrophic costs to patients.*

*In our study, most of the study population were factory workers. Only 186 workers knew that they had medical insurance and 305 workers knew that they did not have any medical insurance. Other 23 workers were unaware of whether they had medical insurance or not, and at the end of the study, they did not bring about any medical care reimbursement cost. Only 34 patients provided information about medical care reimbursement cost. As a result, the proportion of cost paid by medical insurance was not included in the analysis.*

#### Abstract

Though the study includes both direct and indirect costs, the abstract starts with the terminology ‘expenditures’ which may apparently mislead a casual reader

Follow-up method utilised may be included in the methods under the abstract

*Thank you for this suggestion. We have replaced the word ‘expenditures’ with ‘costs’ to avoid misunderstanding and added the follow-up method in the abstract.*

#### Methodology

In the study settings,

the following may be included, which have implications while interpreting of the results:

1. Proportion of Treatment and Retreatment Cases in the District;

*Thanks for this suggestion. In the discussion section, we mentioned the proportion of treatment and retreatment cases in line 508-509 as follows: The re-treatment rate in our study was 5.84%, which is similar to that reported in other studies, with a re-treatment rate of 6.7% in Shenzhen and 6.4% in other provinces in China.*

2. Actual figures of Incidence and Prevalence of Tuberculosis in Shenzhen Region/Bao’ an District (lines 119-120), which needs to be specified separately further between natives and migrants;

*We appreciate your suggestion. We have added the data in line 139-141 as follows: In 2010, the prevalence rate of smear positive of native population was 19.44 per 100 000 population, and that of the migrant population was 59.96 per 100 000 population.*

3. No. of TB Cases in the District during the study year among natives and migrants;

*Thanks for this suggestion. We have listed the number in line 400-402 as follows: The total number of registered active tuberculosis cases were 1317, included 76(5.8) native case and 1241(94.2%) migrant cases in 2013.*

4. No. of (mandatory) visits as per the existing TB program during treatment;

*Thank you for this suggestion. We have added the data in line 157.*

5. Proportion of patients with TB having co-morbidities namely diabetes, HIV, lung cancer etc

*We appreciate your suggestion. Because in our study, the patients with co-morbidities were excluded from the study, it is impossible to calculate the proportion of patients with TB having co-morbidities.*

6. Whether Active Case finding strategy is implemented or not;

*We appreciate your suggestion. In the study setting section, we have added the statements in line 132-139 to clarify the way of TB patients being found in China as follows: The hospitals were the main place finding tuberculosis case and the Center for Prevention and Cure of chronic diseases (CPC) were the local designated TB facilities in the national TB programme networks, providing treatment and managing the tuberculosis cases. The healthcare providers in general hospitals were obligate to refer the suspected cases to CPC and the basic information of suspected cases were sent to CPC. If the cases did not consulted to CPC in time, the workers of CPC would contact the suspected case. Actively cooperating with medical institutions and TB prevention and control institutions, the discovery rate and report quality was increasing by years.*

7. Mean/Median household (and/or Individual) income in the region/district;

*Thank you for this suggestion. We have added the median household income in Bao'an district in line 155-157 as follows: The mean household income in the region was 6,656.79 USD of 2012 according to the Statistical yearbook 2013.*

8. Proportion of people in different economic categories;

*We appreciate your suggestion. However, we did not have access to the detailed information about the income of different population.*

9. a brief description of occupational health care provisions/model in the district relevant to TB care;

*Thanks for this suggestion. In China, there is no occupational health care provisions/model focus on TB prevention only, the workers in our study were provided with the general occupational health service. For example, the workers may participant in the regular medical examination paid by the factory owner.*

10. brief description of the existing intervention in the district to address economic burden faced by patients/households due to TB

*We appreciate your suggestion. In line 148-151, we described the existing free policies to relief the economic burden on TB patients: The Center for Prevention and Cure of chronic diseases (CPC) is the institution authorized to provide TB diagnosis, treatment, and monitoring. The CPC provides patients with a radiologic imaging studies (X-ray) while diagnosed, and sputum smear tests during treatment, and anti-TB drugs for 6-8 months for free.*

11. whether hospitalisation costs due to TB for persons with TB are covered under the existing program?

*Thank you for this suggestion. The hospitalization costs due to TB was not covered under the existing program and born by the patients themselves. We have added the statements in line 148-151 to state the range of free TB policy. Since the cost regarding hospitalization is not included in the policy, it have to be borne by patients themselves.*

Study Design:

Why were those aged above 59 years not included for the study? Reasons may be stated and also

included/addressed in the discussion.

*We appreciate your suggestion. People ages above 59 are more likely to have comorbidities which may influence the analysis of economic burden, so we excluded them. We have added the reason in line 166-167 as follows: The patients aged above 59 were excluded considering the elderly may have more commodities and those with MDR-TB were excluded too.*

In the discussion, need to consider, how non-inclusion of those with morbidity namely Diabetes, HIV affected the representativeness of the study. HIV and Diabetes have programmatic implications for Tuberculosis control as well as have been shown by studies in the literature to drive the costs due to tuberculosis higher.

*Thanks for this suggestion. We have discussed the influence of non-inclusion on the representativeness of our study in the limitation section in line 392-398 as follows: We included 533 eligible patients in the survey, 19 of which were lost to follow-up. The average age of them was  $29.6 \pm 10.2$  years. The male was 14 and female was 5. One patient was with a severe symptoms appeared hemoptysis. The others were with mild or moderate symptoms like cough, chest distress and fever etc. the lost to follow-up was about 4 percent, and the general Socio-demographic and clinical characteristics of those 19 participants lost to follow-up were identical with the 514 patients. So, we considered there no much influence on our conclusion.*

*However, the exclusion can inevitably injure the representativeness, so we added this point as a limitation of our study in line 519-523 as follows: Our study only investigated the economic burden of patients brought by TB and those with severe co-morbidities such as AIDS, diabetes, and lung cancer were excluded. Therefore our study may reflect the economic burden faced by TB patients instead of all population.*

Where those with MDR-TB excluded? Or is it that there were no drug resistant cases during the study period, which is quite unlikely. The authors have not stated whether the study is about costs due to drug sensitive tuberculosis. These needs to be clarified in title, abstract, justification (objectives), methods, and discussion.

*Thank you for this suggestion. We have added the statement in the Study Design and population part in line 165-167. To illustrate the study population of our survey more accurate, we have added the particular explanation in every section accordingly.*

*In our study, there were only 4 patients with MDR-TB among total 514 patients. One patient failed to achieve TB suppression in the third month of treatment, and the other three patients developed drug resistance during the treatment. Doctors adjusted the medicine according to their condition and part of second-line medicine is not free. Because there were few patients with MDR-TB, we did not eliminated them from the analysis. However, they may not have much impact on the stability of the analysis.*

Sample Size has not been estimated by the authors. Studies in the literature on Cost of illness have adopted different methods to calculate sample size. They may be referred to.

*We appreciate your suggestion. Ahead of our study, we did not calculate the sample size we needed. We included every patient who met the inclusion criteria and agreed to take part in our survey during the study period. Analysis results showed that the sample size of our study is enough to achieve the power required.*

The cost data was based on self-reporting. The authors have mentioned both in the methodology and strengths in discussion, that that a logic-check was done. Brief description of this may be

provided to help readers understand how this enabled better data quality.

*We appreciate your suggestion. In the Data collection section, we have explained the process of a logic-check in line 187-189 as follows: Those contradictions or missing information would be asked of patients again in a subsequent interview. We also evaluated the quality of collected data by verifying the routine health information system.*

Timing of the first interview in the intensive phase could have affected the recall leading to differential recall among different participants. The data on delay between start of treatment and interview may be provided as mean and range. Similarly, it would be important to state whether the timing of multiple interviews were standardised for all patients.

*Thank you for this suggestion. First interview is in the first month of intensive phase treatment. We have added the median delay time of diagnosis in line 270-271. In the limitation section, we have mentioned that recall bias could not be avoided in our study as it relied on the information self-reported by patients. Patients went to see the doctor in chronic disease station nearby on time and were followed-up during their visit.*

Methodology can include explicitly the perspective from which cost was calculated, though it is understandable from the objective.

*Thanks for this suggestion. We have added the illustration in the line 192 as follows: We analysis the economic burden from tuberculosis patients' perspective.*

The reason for non-inclusion of guardian (companion) cost is not acceptable as the need for guardian are often higher during pre-diagnosis phase as the patients have more illness and may often make multiple visits to one or more provider before the diagnosis and start of treatment. Authors have also reported hospitalisations during pre-diagnosis period. Guardian (companion) costs needs to be included in the analysis.

*We appreciate your suggestion. We regret mentioning that the companion costs was not surveyed in the study. In China, TB is a common disease and most patients do not need companions during the treatment. Another reason is that patients in our study were surveyed in the community or chronic disease station near their home within 15 minutes' walk. So the companion costs during pre-diagnosis period may not have much impact on the outcome. We admit that it is a limitation of our study and have added the explanation in line 523-525 as follows: Second, in our study, we did not survey the information regarding companion costs although it may not have much impact on the results since most TB patients in China did not need to be companion during the treatment.*

The source of questionnaire may be stated and provided.

*Thanks for your suggestion. In this survey, we combined the aim of our study with standardized questionnaire used to investigate the demographic characteristic and designed the questionnaire. We have provided the questionnaire we used as attachment.*

Though the study reported insurance coverage for participants, authors have not stated how reimbursements were adjusted against the costs in the analysis.

*Thanks for your suggestion. In our study, most of the study population were factory workers. Only 186 workers knew that they had medical insurance and 305 workers knew that they did not have any medical insurance. Other 23 workers were unaware of whether they had medical insurance or not, and at the end of the study, they did not bring about any medical care reimbursement cost. Only 34 patients provided information about medical care reimbursement cost. As a result, the proportion of cost paid by medical insurance was not*



*included in the analysis.*

## Results

Clinical characteristics including co-morbidities, pulmonary/extrapulmonary, etc to be included.

Care-seeking characteristics should include number of consultations/visits prior to diagnosis, number of providers visited and type of providers / facility visited (especially private providers /facility as it can vary from single doctor provider facility to corporate hospital)

*We appreciate your suggestion. In the Socio-demographic Characteristics and Care-seeking Behaviors section, we have added the number of consultations prior diagnosis and type of facility visited in line 267-270. However, we did not collect information about the number of providers visited.*

Data on whether the participant was a beneficiary of any of the existing interventions in the district to reduce the economic burden to patients due to TB, needs to be reported, including the quantum of benefit

*Thanks for your suggestion. We have mentioned the coverage of the existing free TB policy in the Study setting section in line 149-151. In the second paragraph, we have also added the description of the extent of free treatment and the cost covered by the policy in line 404-406 as follows: Under the DOTS program, the CPC provide tuberculosis patients with a radiologic imaging studies (X-ray) , sputum smear tests and anti-TB drug during treatment for free amounting to 102.07 USD.*

The cost during different phases of treatment could also be made available especially since authors have conducted multiple interviews through follow-up to obtain costs through the treatment period. They are important while planning interventions

Where there no hospitalisation episodes among participants during the treatment phase?

*We appreciate your suggestion. Our study only investigated the cost reported by the patients occurred in the chronic disease station. There was no inpatient ward in the chronic disease station, so we did not surveyed the information about hospitalization.*

In Table 2, what are these Non-Tb drugs?

*Thank you for this suggestion. We have added the subsidiary drugs in line 152-153.*

In table 3, what timeline does sputum smear test pertain to? What is the definition of household economic burden? What is the definition for degree of symptoms at diagnosis? Is it self-reported or based on clinical assessment? The Operational definition of these variables need to be included in the methodology.

*Thanks for this suggestion. We have illustrated these definitions clearly in **table 1**.*

Why insurance coverage was not included as a factor for economic burden?

*Thanks for your suggestion. In our study, most of the study population were factory workers. Only 186 workers knew that they had medical insurance and 305 workers knew that they did not have any medical insurance. Other 23 workers were unaware of whether they had medical insurance or not, and at the end of the study, they did not bring about any medical care reimbursement cost. Only 34 patients provided information about medical care reimbursement cost. As a result, the proportion of cost paid by medical insurance was not included in the analysis.*

Among the factors considered for economic burden, some of them pertain to pre-diagnosis costs and other may pertain to treatment phase costs and few many be for total costs. It is recommended that these be split accordingly instead of considering everything together, as there are implications for suggesting possible interventions to reduce cost.

*We appreciate this suggestion. Considering everything together is truly not legible and easy to guide practice. So we decided to analyze the factors associated with pre-diagnosis and post-diagnosis separately according to your suggestion.*

Discussion

While the population of the district has 65% migrants, in the study, 95% of the study participants are migrants. This can have implications for representativeness of the study. This needs to be discussed in detail; this again importance further since it is one of the factors found to be significantly associated with economic burden as in table 3.

*Thanks for this suggestion. We have discussed it carefully in line 402-405 as follows: As one of the most population of Shenzhen City and owing numbers of factories , the migrant population in Bao'an district always exceeds the average level of Shenzhen City. The total number of registered active tuberculosis cases were 1317, included 76(5.8%) native case and 1241(94.2%) migrant cases in 2013. In our study, 95 percent were migrant cases, so our study can reflect the TB condition of Bao'an district truly.*

Socio-demographic and clinical characteristics of those 19 participants lost to follow-up need to be reported and the implications of the study results need to be discussed

*We appreciate this suggestion. In line 395-401, we have added the statement of the influence of lost follow-ups on our outcome.*

Of the 533 participants, 176 patients were reported to have been shifted to CPC with no costs for patients during pre-diagnosis period. Can description of these transfers provided and included in study setting. How this lead to no delays and no costs are important for understanding the drivers of costs/economic burden.

*Thank you for this suggestion. We have added the detailed illustration in the study setting section in line 132-139.*

Line 413, what are the author establishing by stating ‘recall and reporting bias could not be avoided, even in this longitudinal design’ The statement is self-contradictory. May need to be revised

*Revised, thank you.*

Figure may not be needed as this information is represented in the table 2 and is clearly evident too.

*We appreciate this suggestion. We deleted figure 1 in the article.*

Some Typographical Errors

Alignment of 70% in Age category 40-50 in Table 1

Subtitle Insurance to be made bold in Table 1

Weblink in line 112 may be shifted to reference and reference number provided

Title of Table 3, CNY needs to be removed

*Revised, thank you.*

Reviewer #2: 1. The author needs to add some more details on opportunity cost i.e, income loss by patients due to illness. Some patients were hospitalized but they have earnings from job



without wage loss then how to quantify the opportunity cost? Also, variation in salary is very heterogenous. The author needs to describe about opportunity cost.

*We appreciate this suggestion. We have describe the opportunity cost in **table 1** carefully. If TB patients still worked during the hospitalization, then there was no wage loss and the wage loss was 0.*

2. Under background characteristics, author mentioned about insurance company, but for Out of Pocket Expenditure (OOPE), we should not mention reimbursements given by insurance company. If the patients are getting reimbursements from any type of insurance, it should be deducted from the total out of pocket expenditure.

Net out of pocket expenditure = Total expenditure - Reimbursement.

Reimbursement amount should be highlighted if possible.

*Thank you for this suggestion. We realized that it was inappropriate to use the term 'out of pocket expenditure' to describe the economic burden for in our study, the cost covered by medical insurance is not included in the analysis. In our study, most of the study population were factory workers. Only 186 workers knew that they had medical insurance and 305 workers knew that they did not have any medical insurance. Other 23 workers were unaware of whether they had medical insurance or not, and at the end of the study, they did not bring about any medical care reimbursement cost. Only 34 patients provided information about medical care reimbursement cost. As a result, the proportion of cost paid by medical insurance was not included in the analysis.*

3. In methodology section, the author has mentioned the Chi-square test and Mann-Whitney analysis to examine the effect of each predictor variable on economic burden. But Chi-square test is used to know the association between predictor variables and regression analysis is used to understand the effects of predictor variables.

*We appreciate your suggestion. We have revised the analysis method and Chi-square test is not used this time. So we deleted it.*

4. Table 3 analysis indicated that factors related to direct and opportunity costs (CNY) and in relation with the background variables. The heading should be association or differentials by background characteristics of patients and table 4 is showing the factor with regression analysis.

*We have revised the table titles according to your advice and thanks for your advice.*

5. In table 4 multivariate analysis, only few predictor variables have been added. However, the author described in methodology section A forward stepwise approach was used to find the appropriate model. If P-value less than 0.05 is significant. It is good and recognised methods for adding the variables in regression analysis. Try also Variance inflation factor (VIF) to know the multicollinearity in predictor variables. If VIF less than 10, than the author can add the predictor variables and explore more variable as predictor variables.

*Thank you for this suggestion. We have adjusted the data analysis method according to your suggestion.*

Based on the above observations and looking into overall merit of the paper, few modifications in line of above points may be considered before sending it for publication.
